1 ***Colwellia* and *Marinobacter* metapangenomes reveal species-specific responses to oil**  
2 **and dispersant exposure in deepsea microbial communities**

3  
4 Tito David Peña-Montenegro<sup>1,2,3</sup>, Sara Kleindienst<sup>4</sup>, Andrew E. Allen<sup>5,6</sup>, A. Murat  
5 Eren<sup>7,8</sup>, John P. McCrow<sup>5</sup>, Juan David Sánchez-Calderón<sup>3</sup>, Jonathan Arnold<sup>2,9</sup>, Samantha  
6 B. Joye<sup>1,\*</sup>

7  
8 Running title: Metapangenomes reveal species-specific responses

9  
10 <sup>1</sup> Department of Marine Sciences, University of Georgia, 325 Sanford Dr., Athens,  
11 Georgia 30602-3636, USA

12  
13 <sup>2</sup> Institute of Bioinformatics, University of Georgia, 120 Green St., Athens, Georgia  
14 30602-7229, USA

15  
16 <sup>3</sup> Grupo de Investigación en Gestión Ecológica y Agroindustrial (GEA), Programa de  
17 Microbiología, Facultad de Ciencias Exactas y Naturales, Universidad Libre, Seccional  
18 Barranquilla, Colombia

19  
20 <sup>4</sup> Microbial Ecology, Center for Applied Geosciences, University of Tübingen,  
21 Schnarrenbergstrasse 94-96, 72076 Tübingen, Germany

22  
23 <sup>5</sup> Microbial and Environmental Genomics, J. Craig Venter Institute, La Jolla, CA 92037,  
24 USA

25  
26 <sup>6</sup> Integrative Oceanography Division, Scripps Institution of Oceanography, UC San  
27 Diego, La Jolla, CA 92037, USA

28  
29 <sup>7</sup> Department of Medicine, University of Chicago, Chicago, IL, USA

30  
31 <sup>8</sup> Josephine Bay Paul Center, Marine Biological Laboratory, Woods Hole, MA, USA

32  
33 <sup>9</sup> Department of Genetics, University of Georgia, 120 Green St., Athens, Georgia 30602-  
34 7223, USA

35  
36 \*Correspondence: Samantha B. Joye; Email: [mjoye@uga.edu](mailto:mjoye@uga.edu); Tel: 001-706-542-5893;  
37 Fax: 001-706-542-5888

## 38 Abstract

39

40 Over 7 million liters of Corexit EC9500A and EC9527A were applied to the Gulf of  
41 Mexico in response to the Deepwater Horizon oil spill. The impacts of dispersants remain  
42 under debate and negative, positive, and inconclusive impacts have been reported. Here,  
43 metatranscriptomics was applied in the context of metapangenomes to microcosms that  
44 simulated environmental conditions comparable to the hydrocarbon-rich 1,100 m deep  
45 plume. Within this microcosm study, negative effects of dispersants on microbial  
46 hydrocarbon degradation were previously reported based on activity measurements and  
47 geochemical data. Transcriptional enrichment of *Colwellia*, a potential dispersant  
48 degrader, followed variable time-dependent trajectories due to interactions between oil,  
49 dispersants, and nutrients. The *Colwellia* metapangenome captured a mixture of  
50 environmental responses linked to the *Colwellia psychrerythraea* 34H genome and to the  
51 genomes of other members of the *Colwellia* genus. The activation of genes involved in  
52 lipid degradation, nitrogen metabolism, and membrane composition under oil or nutrient  
53 availability, suggested an opportunistic growth strategy for *Colwellia*. In contrast,  
54 transcripts of *Marinobacter*, a natural hydrocarbon degrader, increased only in oil  
55 treatments. *Marinobacter* transcripts largely recruited to the accessory metapangenome of  
56 *Marinobacter* sp. C18, the closest genomic reference. A complex response involving  
57 carbon and lipid metabolism, chemotaxis and a type IV secretion system suggested active  
58 energy-dependent processes in *Marinobacter*. These findings highlight chemistry-  
59 dependent responses in the metabolism of key hydrocarbon-degrading bacteria and  
60 underscore that dispersant-driven selection could temper the ability of the community to  
61 respond to hydrocarbon injection.

62

63 **Key Words:** *Colwellia*, *Colwellia psychrerythraea* 34H, *Marinobacter*, *Marinobacter* sp.  
64 C18, Deepwater Horizon oil spill, metatranscriptome, metapangenome, Corexit.

## 65 Introduction

66

67 A series of tragic events led to the explosion and sinking of the Deepwater Horizon  
68 (DWH) drilling rig on April 20<sup>th</sup> of 2010. At least 4.9 million barrels of crude oil were  
69 discharged into the northern Gulf of Mexico (Gulf) over the ensuing 84 days. During the  
70 response to the disaster, more than seven million liters of synthetic dispersants (Corexit  
71 EC9500A and EC9527A) were applied to surface oil slicks, and the discharging wellhead  
72 at 1500 m depth<sup>1,2</sup>. This unprecedented application of dispersants enhanced oil droplet  
73 formation, aqueous phase solubilization and aimed to increase biodegradation at depth,  
74 but may have had negative effects on the microbial communities<sup>3-5</sup> and marine  
75 organisms<sup>6-9</sup>. Though dispersant application is a common response to oil spills, their  
76 effects on marine microbial populations is unclear, and the impacts on hydrocarbon  
77 biodegradation are debated<sup>10,11</sup>. A more comprehensive understanding of how dispersants  
78 impact microbial populations is necessary to inform response strategies for future oil  
79 spills in oceanic environments.

80

81 One way to obtain such an understanding is to compare and contrast the response of key  
82 oil degrading microorganisms to dispersant and/or oil exposure. We present such an

83 analysis here using samples from *ex situ* experiments<sup>3</sup> in which the patterns of ecological  
84 succession of microbial communities was consistent to those observed in the deepwater  
85 oil plumes that formed during the DWH incident<sup>12-14</sup>. The community of indigenous  
86 hydrocarbon degraders in the Gulf may respond to specific ecological niches, resulting in  
87 proliferation of certain species in the event of an oil spill. Seven weeks after the initiation  
88 of the oil spill, the dominant Oceanospirillales communities shifted to a community  
89 dominated by *Cycloclasticus* and *Colwellia*<sup>15-17</sup>. Subsequent research showed that some  
90 *Colwellia* responded rapidly *in situ*<sup>17,18</sup>, and in experiments utilizing controlled additions  
91 of oil and dispersed oil<sup>3,17,19</sup>. Other species typically associated with hydrocarbon  
92 degradation in the Gulf (*i.e.*, *Alcanivorax*) were not detected in plume samples<sup>12,15,20,21</sup>.  
93 *Marinobacter*, first described in 1992<sup>22</sup>, colonizes psychrophilic, thermophilic, and high  
94 salinity marine environments<sup>23</sup>. Members of the *Marinobacter* played a major role in the  
95 degradation of *n*-hexadecane during the DWH incident<sup>24</sup>; some strains can also degrade  
96 polycyclic aromatic hydrocarbons (PAH) under anoxic conditions<sup>25</sup>. The application of  
97 chemical dispersants can inhibit *Marinobacter* spp.<sup>3-5,26</sup>. Recently, Rughöft et al. reduced  
98 growth and hydrocarbon biodegradation of previously starved cultures of *Marinobacter*  
99 sp. TT1 after Corexit EC9500A exposure<sup>27</sup>. There is much more to learn about the  
100 interactive role of dispersants, nutrients, and oil in influencing the ecological fitness of  
101 *Marinobacter* and *Colwellia*.

102  
103 Previous results have shed light on the changes of microbial ecology and metabolism in  
104 response to the DWH spill. Relatively complete metabolic databases for the degradation  
105 of simple hydrocarbons and aromatic compounds have been reconstructed from  
106 metagenomes, metatranscriptomes and single-cell genomes in the proximity of the DWH  
107 wellhead<sup>12,21,28</sup>. 16S rRNA gene sequencing studies revealed variable enrichment of  
108 *Marinobacter*, *Alcanivorax*, *Cycloclasticus*, and *Alteromonas* in controlled oil-dispersant  
109 enrichments<sup>3,4,26,29,30</sup>. Here, we provide the first pangenomic analysis of both *Colwellia*  
110 and *Marinobacter* in the context of transcriptional responses to the environment. We (1)  
111 describe the transcriptional signature of active microbial groups and metabolic functions  
112 in the K2015 dataset, (2) inspect the association of eco-physiological rates by contrasting  
113 the profiles of 16S rRNA gene sequences and metatranscriptomic reads and (3)  
114 investigate the ecological role of niche partitioning between *Colwellia* and *Marinobacter*  
115 through assessing differentially expressed genes in the context of metapangenomes.  
116

## 117 **Results**

118  
119 This work builds on the foundational paper of Kleindienst et al. which simulated the  
120 environmental conditions in the hydrocarbon-rich 1,100 m deep water plume during the  
121 DWH spill<sup>3</sup>. Their experiment compared the effect of oil-only (supplied as a water-  
122 accommodated fraction, “WAF”), Corexit (“dispersant-only”), oil-Corexit mixture  
123 (chemically enhanced water-accommodated fraction, CEWAF) and CEWAF with  
124 nutrients (CEWAF+nutrients) on Gulf deep-water microbial populations. The application  
125 of a dispersant, CorexitEC9500, hereafter Corexit, did not enhance heterotrophic  
126 microbial activity or hydrocarbon oxidation rates. Corexit stimulated growth of  
127 *Colwellia*, and oil, but not dispersants, stimulated *Marinobacter*. This paper provides

128 metatranscriptomic data from this experiment, hereafter referred to as the K2015  
129 experiment.

130  
131 Transcriptomic libraries (n=27) ranged in size from 4.6 to 18.75 million reads, with a  
132 mean of 10.58 million reads per sample and an average read length of 97 bp. About  
133 44.38% of reads remained after quality control and removal of sequencing artifacts and  
134 duplicates (**Supplementary Figure 1A**). Predicted features were assigned to 68% of  
135 these reads, and 2.74% of reads were associated with rRNA transcripts (**Supplementary**  
136 **Figure 1B**). In total 11.3 million reads mapped taxonomic features with an average of  
137 1,638 reads assigned to archaea, 403,781 reads assigned to bacteria, 5,357 reads assigned  
138 to eukaryotes, and 10,542 reads assigned to viruses. Roughly 3.1 million reads per library  
139 were annotated at the functional level (**Supplementary Results, Supplementary Figure**  
140 **2**). Further analysis on a functional or taxonomic level used normalized mRNA read  
141 counts assigned to known functions or taxa respectively (**Supplementary Data 1**).

#### 142 ***Dispersants altered microbial community signatures at the expression level***

143 Exposure to synthetic dispersants generated taxa-specific responses in expression that  
144 modulated the community response to oil and dispersant exposure. The taxonomic profile  
145 of the active population revealed by the annotated transcripts resembled the community  
146 structure revealed through 16S rRNA gene sequencing<sup>3</sup>. The rarefaction analysis showed  
147 a decrease of diversity in the dispersants-only and oil-only treatments (**Supplementary**  
148 **Results, Supplementary Figure 3**). All dispersant amended samples showed  
149 transcriptional enrichment for *Colwellia*, an organism known for its role in hydrocarbon  
150 and dispersant degradation<sup>32</sup>. After 1 week, the relative abundance of *Colwellia*  
151 transcripts increased from 3.9–7.4% to 71.4–79.6% in dispersant-only and CEWAF  
152 ( $\pm$ nutrients) treatments (**Figure 1**) and by 7.2% to 26.3–34.9% in WAF treatments.  
153 *Colwellia* showed a more substantial increase in gene expression (by 30.6%) than in  
154 abundance (16S rRNA gene counts increased by 2.5%) in the WAF treatment.  
155 *Marinobacter* accounted for most of the increase in transcriptional signals in WAF  
156 treatments, with a relative increase from 7.0% to 18.7–52.5% after 4 weeks (**Figure 1**). In  
157 dispersant-only and CEWAF( $\pm$ nutrients) treatments, *Marinobacter* transcripts decreased  
158 from 6.0–9.0% to 0.5–0.8%. After the first week, the *Colwellia* transcriptomic response  
159 declined in WAF treatments while that of *Marinobacter* increased. After 6 weeks of  
160 dispersants-only exposure, increased expression by *Kordia* (up by 46.8%) was observed;  
161 this relative increase was far more pronounced than the relative 16S rRNA gene counts of  
162 *Kordia* (11.8%)<sup>3</sup>.

163  
164 To estimate the level of correspondence between transcriptomic and 16S rRNA gene  
165 signals<sup>3</sup>, we calculated the mean log-transformed RNA:DNA ratio (LRD ratio) across  
166 treatments. This index assesses eco-physiological activity where a higher relative cell  
167 synthetic capacity usually correlates with growth activity and nutritional status<sup>34,35</sup>. The  
168 largest fraction of relative counts at the transcriptomic and 16S rRNA gene level were  
169 distributed proportionately across treatments (**Figure 2** Group II:  $|\text{LRD}| < 5$ ). This group  
170 included indigenous hydrocarbon degraders (*Oceanospirillales*, *Marinobacter*,  
171 *Alcanivorax*, and *Polaribacter*) and the dispersant-stimulated *Colwellia*. The second  
172 group of organisms had a larger relative synthetic capacity (**Figure 2** Group I:  $\text{LRD} > 5$ )  
173 and was comprised of members associated typically with methylotrophic metabolism

174 (*Methylophaga*, *Methylobacter*), natural seepage (*Bermanella*), hydrocarbon degradation  
175 (*Pseudomonas*), and alkylbenzenesulfonate degradation (*Parvibaculum*)<sup>36,37</sup>. Finally,  
176 organisms with a low LRD index (**Figure 2** Group III: LRD < 5) included members of  
177 the family *Oceanospirillaceae*, such as *Amphritea*, *Pseudospirillum*, and *Balneatrix*,  
178 hydrocarbon degraders (*i.e.*, *Oleiphilus*, *Porticoccus*, *Cycloclasticus*, *Rhodobacteraceae*,  
179 *Rhodobiaceae*, *Alteromonadaceae*), and members of *Flavobacteria*, *Bacteroidetes*,  
180 *Bdellovibrionaceae* and *Spongibacter*.

181

182 Beta-diversity was assessed via Bray-Curtis dissimilarity-based principal component  
183 analysis (PCA) of metatranscriptomic reads (**Figure 3A**). Consistent with the taxonomic  
184 profile (**Figure 1**), all treatments amended with dispersants clustered with *Colwellia*. Oil-  
185 only samples occupied a separate cluster transitioning over time from a broad positive  
186 association with *Gammaproteobacteria* towards a positive association with *Marinobacter*  
187 specifically. A third cluster comprising the biotic control spanned a positive association  
188 with *Gammaproteobacteria* with small positive contributions from *Marinobacter*,  
189 *Bacteroidetes*, *Polaribacter*, *Flavobacteriales*, and *Alcanivorax*.

190

191 To assess effects of chemical exposure and time, we performed permutational  
192 multivariate analysis of variance (PERMANOVA) on I) taxonomic dissimilarity (*i.e.*,  
193 Bray-Curtis) distances, and II) phylogenetic dissimilarity via weighted mean pairwise  
194 distances (MPD) and weighted mean nearest taxon distances (MNTD). Dispersant ( $p =$   
195 0.001) and time ( $p = 0.001$ ) terms significantly explained the variability of the Bray-  
196 Curtis distances profile. Similarly, dispersant ( $p = 0.001$ ), time ( $p = 0.015$ ), and  
197 dispersant•time ( $p = 0.037$ ) explained the MPD phylogenetic distance profile. In  
198 contrast, oil•time ( $p = 0.010$ ) and dispersant•oil•time ( $p = 0.005$ ) explained the MNTD  
199 phylogenetic distance profile, indicating that higher levels of dissimilar transcriptional  
200 responses were observed in dispersant treatments and over time. By weighting  
201 transcriptional abundances and phylogenetic proximity among taxa, we observed that the  
202 interaction terms oil•time and dispersant•oil•time became significant for explaining  
203 MNTD dissimilarity distances in the dataset. The interaction of oil( $\pm$ dispersants) and time  
204 showed significant correlation with changes in the phylogenetic distances associated to  
205 the microbial evolution of the communities.

206

### 207 ***Chemical exposure results in rapidly diverging functional profiles***

208 In the first two weeks after chemical exposure, the CEWAF treatment exhibited a relative  
209 expression increase in 20 functional categories (**Supplementary Figures 4 and 5**),  
210 including secondary metabolism, motility, and chemotaxis, dormancy, sporulation, sulfur  
211 metabolism, and stress response categories. In contrast, the dispersant treatment showed a  
212 delayed transcriptional response in the same categories. In 17 out of 20 categories, we  
213 observed that two described behaviors occurred simultaneously: (1) a strong fast response  
214 near  $t_1$  and then a decay for the CEWAF treatment and (2) a slow incremental response  
215 with a maximum peak at  $t_4$  for the dispersant treatment. Phages, prophages, transposable  
216 elements, and plasmids were the only functional category where the oil-only treatment  
217 showed the largest relative expression peak across treatments. The relative expression of  
218 cofactors, vitamins, prosthetic groups, and pigments increased in the first weeks followed

219 by a decrease towards the end of the experiment for all of the treatments, except the biotic  
220 control.

221

222 To further assess the influence of the chemical exposure on the metabolic variation  
223 among the metatranscriptomes at different layers of annotation, a PCA of the functional  
224 features abundance across the SEED annotation levels was conducted (**Figure 3B**,  
225 **Supplementary Figure 6, Supplementary Results**). After  $t_0$ , dispersant amended  
226 samples showed a transcriptional divergence shifting away from samples not exposed to  
227 dispersants (*i.e.*, WAF and control samples) at the level of functions of major non-  
228 housekeeping modules (**Figure 3B**). Biotic control and WAF libraries showed similar  
229 clustering trends along the Pyruvate Formate Lyase (PFL) (E.C. 2.3.1.54) loading vector.  
230 Higher expression of PFL was strongly associated with the  $t_0$  libraries in the treatments.  
231 On the other hand, CEWAF( $t_1$ ,  $t_2$ ) and dispersants( $t_4$ ) samples showed a strong positive  
232 association with PC1, supported by the contribution of isocitrate lyase (EC 4.1.3.1),  
233 TonB-dependent receptor (TBDR), propionate-CoA ligase (E.C. 6.2.1.17) and other  
234 features involved in the biosynthesis of amino acids; biosynthesis of storage compounds  
235 (*i.e.*, polyhydroxybutanoate biosynthesis via acetoacetyl-CoA reductase E.C. 1.1.1.36);  
236 generation of metabolite and energy precursors; and degradation of carboxylates,  
237 carbohydrates and alcohols.

238

239 Transcription profiles in dispersant treatments followed a different trend in the clustering  
240 space compared to the CEWAF treatments. This behavior was observed (**Supplementary**  
241 **Figure 6B**) early in the experiment (*i.e.*,  $t_1$ ) and stronger transcriptomic responses were  
242 apparent in CEWAF amended samples; the dispersants-only amended samples showed  
243 stronger transcriptomic signals towards the end of the experiment (*i.e.*,  $t_4$ ). Over time,  
244 transcriptional profiles shifted toward a negative association with PC1 and PC2 for all  
245 except the dispersant-only treatments, possibly indicating systematic transcriptional  
246 changes associated with the transition from an open-water system to a microcosm setting.

#### 247 *Nutrients modulate transcriptional dynamics under chemical exposure*

248 Nutrient availability can affect how microbes respond to environmental stressors. To  
249 identify pathway perturbations in metatranscriptomic signals over time, we fitted a set of  
250 linear models using normalized mapped transcript counts per pathway and per treatment  
251 as a function of time. Each fitting procedure aimed to identify the model with best fit  
252 (*i.e.*, greatest correlation coefficient  $R^2$ ) by comparing (1) a first order linear model with a  
253 slope greater than 1.88 as increasing linear (IL), (2) with a slope below -1.88 as  
254 decreasing linear (DL), (3) and constant (CL) in between; (4) a positive skewed log-  
255 normal model to shape early peaks (EP) in the transcriptional distribution; (5) a negative  
256 skewed lognormal model to shape late peaks (LP); and (6) a U-shaped (U) second order  
257 linear model. Best fitting models for each pathway and treatment are shown in  
258 **Supplementary Figure 7**.

259

260 The dispersants-only and the CEWAF+n treatments were mostly associated to U and EP  
261 trends, respectively (**Supplementary Results, Supplementary Figure 8**). This change in  
262 the dynamic of transcriptional time trends was also supported by a paired Pearson  $\chi^2$  test.  
263 The test aimed to identify statistical differences between the biotic control and the  
264 amended samples. All of the treatments were significantly different from the biotic

265 control ( $p$ -value  $< 0.0001$ ), except the CEWAF treatment ( $p$ -value = 0.1592). Further  
266 examination in a logistic fitting model indicated that dispersants ( $p$ -value = 0.0051),  
267 WAF ( $p$ -value  $< 0.0001$ ) and nutrients ( $p$ -value  $< 0.0001$ ) could explain the variability of  
268 the transcriptional time trend profiles in the experiment.

### 269 *Linking metabolic mechanisms to Colwellia and Marinobacter metapangenomes*

270 Between treatments difference in *Colwellia* and *Marinobacter* abundance was a key  
271 discovery in the K2015 dataset<sup>3</sup>, and this study aimed to elucidate the underlying  
272 mechanisms through assessment of differentially expressed (DE) genes. The first step  
273 was to identify the best reference genomes for *Colwellia* and *Marinobacter*. We mapped  
274 the transcriptomic libraries to all available complete genomes (NCBI) of these  
275 microorganisms. Mapping counts and mapping reads for all of the recruited reads are  
276 shown in **Supplementary Data 3**. Genomic references with the largest mapping  
277 recruitment were ~6.0 million reads for *Colwellia psychrerythraea* 34H; and ~1.7 million  
278 reads for *Marinobacter* sp. C18.

279  
280 We performed a DE analysis to identify the collection of genes that showed a significant  
281 change in the expression levels compared to the biotic control. Mapping counts profiles  
282 recruited by the reference genomes were used as input to perform the DE analysis.  
283 Distinct profiles of total numbers of DE genes were observed between *Colwellia* and  
284 *Marinobacter*. The oil-only treatment showed the largest amount of DE genes for  
285 *Marinobacter*, and the smallest amount of DE genes for *Colwellia* (red and blue  
286 histograms in **Figures 4 and 5**). In contrast, the largest fraction of DE genes was  
287 observed in dispersant-amended treatments for *Colwellia*, while the smallest fraction of  
288 DE genes for *Marinobacter* occurred in dispersant-amended treatments. The distribution  
289 of upregulated genes ranged from 37 to 179 for *Marinobacter*; and from 12 to 55 for  
290 *Colwellia*. In contrast, the distribution of downregulated genes ranged from 29 to 89 for  
291 *Marinobacter*; and from 44 to 63 for *Colwellia*.

292  
293 To assess the representation of the recruited reads in terms of species level adaptations to  
294 the microcosm environment, we merged the mapping profiles into their corresponding  
295 pangenomes. Pangenomes were generated using all available complete genomes in NCBI  
296 of *Colwellia* and *Marinobacter* using Anvi'o<sup>40,41</sup>. The analysis included a total of 33  
297 *Colwellia* genomes and 113 *Marinobacter* genomes. We grouped gene clusters that  
298 contained at least one DE gene and the resulting metapangenomic splits (**Figures 4 and**  
299 **5**). We refer this collection of data as the 'metapangenome' – it reflects the outcome of  
300 the analysis of pangenomes in conjunction with the abundance and prevalence of  
301 reference DE genes associated gene clusters recovered through shotgun  
302 metatranscriptomes.

303  
304 The *Colwellia* metapangenome (**Figure 4**) with a total of 6,646 gene calls resulted in 225  
305 gene clusters. We grouped these gene clusters into two bins based on their occurrence  
306 across genomes: (1) core gene clusters ( $n=155$  or 68.%) reflect clusters found in all of the  
307 genomes, and (2) accessory gene clusters ( $n=70$  or 31.4%) reflect clusters found in a sub-  
308 set of genomes. Most of the gene clusters contained DE genes with functional annotation  
309 from InterproScan ( $n=100\%$ ), and from COGs ( $n=97.3\%$ ).

310

311 The *Marinobacter* metapangenome (**Figure 5**) with a total of 35,909 gene calls resulted  
312 in 342 gene clusters. 156 and 186 gene clusters were associated with the core and  
313 accessory metapangenome, respectively. Most of the gene clusters contained DE genes  
314 with functional annotation from InterProScan ( $n=100\%$ ), and from COGs ( $n=97.4\%$ ).  
315

316 Some DE genes were clustered in the core metapangenome of *Colwellia* (**Figure 4**,  
317 **Supplementary Data 2**). For instance, in the oxidative phosphorylation, energy and  
318 carbohydrate metabolism category, we observed upregulation in the CEWAF( $\pm$ nutrients)  
319 treatments for: the succinate dehydrogenase *sdhC* gene (K00241), the ATPase *atpA* gene  
320 (K02111), the 2-oxoglutarate dehydrogenase complex dihydrolipoamide dehydrogenase  
321 *lpd* gene (K00382) and the respiratory NADH-quinone reductase *nqrB* gene (K00382).  
322 Similarly, the gene *sucC* encoding for the succinyl-CoA synthetase  $\beta$  subunit (K01903),  
323 part of the TCA cycle, was upregulated in the CEWAF( $\pm$ nutrients) treatments. Stress  
324 response and folding catalysts genes were upregulated in the CEWAF treatment,  
325 including the cold shock protein gene *cspA* (K03704) and the FK506-binding protein  
326 (FKBP) gene *tig* (K03545). Nitrogen fixation genes *nifU* (K04488) and *nifS/iscS*  
327 (K04487) were upregulated in the CEWAF treatment. Interestingly, the *nifU/iscA* gene  
328 (K15724), also found in the core metapangenome of *Colwellia*, was downregulated in the  
329 WAF treatment. The *accC* gene encoding for acetyl-CoA carboxylase (K01961), and the  
330  $\beta$ -acetoacetyl synthase *fabY* gene (K18473), which are involved in fatty acid  
331 biosynthesis, were up-expressed in the CEWAF+nutrients. Finally, a large group of genes  
332 in the COG categories J, K and L, associated with genetic information processing (*i.e.*,  
333 translation, RNA degradation, replication and DNA repair), were also found in the core  
334 metapangenome of *Colwellia*.  
335

336 Other functions that clustered in the core metapangenome of *Colwellia* were only  
337 upregulated in the dispersants only treatment (**Figure 4**, **Supplementary Data 2**),  
338 including membrane precursors such as the phosphatidylserine synthase *pssA* gene and  
339 the UDP-3-O-acyl-GlcNAc deacetylase *lpxC* gene (K02535). Similarly, the two-  
340 component sensor histidine kinase *barA* gene (K07678), the NADPH-sulfite reductase  
341 *cysJ* gene (K00380), the 2Fe-2S ferredoxin *fdx* gene (K04755), the FKBP type peptidyl-  
342 prolyl cis-trans isomerase *fkpA* gene (K03772) and the amidophosphoribosyl transferase  
343 *purF* gene (K00764), were upregulated in the dispersants-only treatment. These results  
344 indicate sophisticated and niche specific responses for *Colwellia* at the genus level (see  
345 Discussion).  
346

347 A significant increase of DE genes was observed in the CEWAF( $\pm$ nutrients) treatments  
348 compared to other treatments for the accessory metapangenome of *Colwellia* ( $\chi^2$  test,  $p$ -  
349 value = 0.0132) (**Figure 4**, **Supplementary Data 2**). The 3-ketoacyl-CoA *phaA* gene  
350 (K00626) and the polyhydroxyalkanoate synthase *phaC* gene (K03821), involved in the  
351 biosynthesis of polyhydroxyalkanoate, were upregulated in the CEWAF treatment.  
352 Interestingly, the *fadR* repressor (K03603) required for fatty acid degradation<sup>42</sup>, was  
353 upregulated in the dispersants-only treatment. The genes CPS\_3734, encoding for a  
354 tryptophan halogenase, and CPS\_3737, encoding for a TBDR, were upregulated in the  
355 CEWAF treatment. CPS\_3734 is located downstream of a SapC-like S layer protein gene  
356 in *C. psychrerythraea* 34H genome (fig|167879.3.peg.2860).



357

358 The addition of nutrients was associated with specific biosynthetic pathways that  
359 clustered in the accessory metapangenome of *Colwellia* (**Figure 4, Supplementary Data**  
360 **2**), including the 2-methylcitrate dehydratase *acnD* gene (K20455), the aconitate  
361 hydratase *acnB* gene (K01682), and the aldehyde dehydrogenase *aldB* involved in  
362 propionate metabolism. Similarly, the granule-associated protein phasin *phaP* gene  
363 (TIGR01841), the acetoacetyl-CoA reductase *phbB1* and *phbB2* genes (K00023),  
364 involved in the biosynthesis of polyhydroxybutyrate, were also upregulated in the  
365 CEWAF+nutrients treatment.

366

367 The core of the *Marinobacter* metapangenome comprised a large group of housekeeping  
368 genes and a large group of genes in the COG categories J, K and L. We also observed the  
369 upregulation of fatty acid biosynthesis gene *fabD* (K00645) in the CEWAF+nutrients  
370 treatment and that the [Fe-S] cluster assembly genes *iscA* (K13628), and *sufB* (K09014),  
371 possibly involved in nitrogen metabolism<sup>43</sup>, were upregulated in the dispersants-only  
372 treatment. The core and accessory metapangenome of *Marinobacter* functionally  
373 overlapped in regard to upregulation of processes involving changes and maintenance of  
374 the membrane, such as the secretory protein genes *secA* (K03070, upregulated in the  
375 WAF±dispersants treatment), and *secB* (K03071, upregulated in the dispersants-only  
376 treatment), as well as the type IV pilus assembly genes *pilM* (K02662) and *pilO*  
377 (K02664), both upregulated in the WAF treatment.

378

379 In contrast, different response mechanisms were apparent in the *Marinobacter* accessory  
380 metapangenome across treatments (**Figure 5, Supplementary Data 2**). For instance, the  
381 chemotaxis sensor kinase genes *cheA* (K03407), *cheY* (K03413), the methyl-accepting  
382 chemotaxis *mcp* gene (K03406), the polysaccharide biosynthesis gene *flaA1* (K15894),  
383 the flagellar protein gene *flaG* (K06603), the flagellar hook-associated genes *flgL*  
384 (K02397), *fliK* (K02414), the type IV pilus assembly genes *pilA* (K02650), *pilW*  
385 (K02672), *fimV* (K08086), and the *ompR* regulator (K02485) were upregulated in the  
386 WAF treatment. The type IV pilus assembly regulator *pilR* (K02667) was also  
387 upregulated in the WAF treatment, but this gene clustered in the core metapangenome.

388

389 A large fraction of genes in the accessory metapangenome of *Marinobacter* were  
390 upregulated in the WAF treatment (**Figure 5, Supplementary Data 2**). Essential genes  
391 involved in carbon and lipid metabolism fall in this category, such as the aconitate  
392 hydratase *acnA* gene (K01681), the C4-dicarboxylate transporter genes *dctM* (K11690),  
393 *dctP* (K11688), the acetyl-CoA acyltransferase *fadA* (K00632), the formate  
394 dehydrogenase gene *fdoG* (K00123), the 4-aminobutyrate aminotransferase *gabT* gene  
395 (K07250), and glycolate oxidase *glcF* gene (K11473). Some stress response genes were  
396 actively transcribed in the WAF treatment, such as the alkyl peroxiredoxin *ahpC* gene  
397 (K03386). Amino acid metabolism genes, e.g., the D-amino-acid dehydrogenase *dada*  
398 gene (K00285), and chloroalkane and chloroalkene degradation genes, e.g., the  
399 haloalkane dehalogenase *dhaA* gene (K01563), were also upregulated in the WAF  
400 treatment. Triacylglycerols and wax biosynthesis for the dormancy-like state gene *tgS*  
401 (K00635) was upregulated in the WAF treatment. These patterns indicated targeted  
402 adaptations of *Marinobacter* sp. C18 to the exposure to oil in oil-only treatments.

403

404 To compare the architecture of metabolic reaction pathways that were upregulated across  
405 the treatments, we mapped KEGG orthology numbers into the iPath 3 module<sup>44</sup> (**Figure**  
406 **6**). An interactive version of the metabolic map is available at  
407 <https://pathways.embl.de/selection/xqvYg5kHHCsxGqWv8yJ>. As mentioned above,  
408 the fatty acid biosynthesis routes from acetate to medium-chain fatty acyl-CoA molecules  
409 were upregulated for *Marinobacter* (in the WAF treatment) and *Colwellia* (in the  
410 dispersants treatment). Additionally, routes involving the TCA cycle, the conversion from  
411 pyruvate and acetaldehyde to citrate as well as the concomitant biosynthesis of L-alanine  
412 via transamination of glyoxylate, occurred in *Marinobacter* in the WAF treatment, and  
413 *Colwellia* in the CEWAF+nutrients treatment. Additional overlapping upregulated  
414 reactions between *Colwellia* and *Marinobacter* were observed in the oxidative  
415 phosphorylation routes and in purine metabolism.

416

## 417 Discussion

418

419 Integrative analysis of 16S rRNA gene sequencing and metatranscriptomic libraries from  
420 the K2015 experiment provided remarkable insights into the response of microbial  
421 communities to oil and/or dispersant exposure. The application of synthetic chemical  
422 dispersant (hereafter dispersant) increased transcriptomic activity of *Colwellia* spp.  
423 (**Figure 1, Figure 3**), consistent with the results in microcosms<sup>3</sup>, as well as *in situ*  
424 observations in the DWH plume<sup>17,28</sup>. This finding is also supported by the classification  
425 of *Colwellia* spp. in the LRD Group-II (**Figure 2**), which contained taxa with the largest  
426 contribution to the microbial transcriptomic profile. The addition of dissolved oil (WAF)  
427 without dispersants stimulated *Marinobacter*'s transcriptomic signals (**Figure 1, Figure**  
428 **3**). *Marinobacter* was also in the LRD Group-II (**Figure 2**). Dispersants not only limited  
429 growth and replication of *Marinobacter*, but also their transcriptional activity.  
430 Additionally, the positive relationship of *Marinobacter* growth in oil-exposed  
431 environments, in the absence of dispersants, is consistent with reports of *Marinobacter*  
432 thriving in oil-derived marine snow flocs generated in the laboratory<sup>45</sup>, and in  
433 pyrosequencing surveys of *in situ* seawater samples<sup>20,46</sup>.

434

435 By leveraging the results of the 16S rRNA gene sequencing and metatranscriptomic  
436 libraries from the K2015 experiment we further identified ecophysiological responses in  
437 less abundant microbial groups. Given the enrichment of transcription read counts over  
438 16S rRNA gene read counts, the LRD Group-I was expected to contain highly active  
439 microorganisms (**Figure 2**). Methylotrophs (*i.e.*, *Methylophaga*, *Methylobacter*) and  
440 native hydrocarbon degraders (*i.e.*, *Bermanella*, and *Parvibaculum*) occurred in this  
441 group<sup>36,37</sup>. This finding is consistent with previous reports of active indigenous oil  
442 degraders including members of these genera<sup>47</sup>. In contrast, *Oceanospirillaceae*,  
443 *Cycloclasticus*, and *Oleiphilus*, which are also known as indigenous hydrocarbon  
444 degraders, were found in LRD Group-III (**Figure 2**). Classifying hydrocarbon degraders  
445 across the spectrum of ecophysiological activity rates suggests time-sensitive, adaptive  
446 responses across the groups of hydrocarbon degrading bacteria. This pattern may also  
447 reflect specific niche-adaptation strategies in hydrocarbon degraders.

448

449 To the best of our knowledge, this is the first report documenting the transcriptional  
450 enrichment of *Kordia* in the aftermath of the exposure to dispersants-only in a deep  
451 seawater microcosm (**Figure 1**). Previous studies reported ecological succession of  
452 bacterial clades with members such as Flavobacteriaceae and Rhodobacteraceae in late  
453 August and September 2010<sup>14,15</sup>. *Kordia*, member of the Flavobacteriaceae family, was  
454 recently assessed at the pangenomic level<sup>48</sup>, revealing that *Kordia*'s core pangenome  
455 comprised a large fraction of cell wall and membrane biogenesis genes, peptidase and  
456 TBDR encoding genes. At  $t_4$  for the dispersants-only treatment, *Kordia* showed an  
457 increased transcriptional activity of TBDR, glyoxylate shunt, membrane biogenesis and  
458 peptidase biosynthesis (**Figure 3B, Supplementary Figures 4 and 5**), matching previous  
459 descriptions of *Kordia* as an active player in niche colonization<sup>48</sup>.

460  
461 *Colwellia* signatures in the K2015 metatranscriptome indicated an opportunistic behavior  
462 that arose from the chemical exposure regime and time. Dispersed oil treatments co-  
463 clustered *Colwellia* with perturbations in the expression of isocitrate lyase, TBDR, and  
464 propionate-CoA ligase, probably involved in the acquisition of substrates and  
465 downstream processing via Glyoxylate Cycle, typically utilized for poor quality carbon  
466 sources<sup>49</sup>. These components followed different trends over time suggesting different  
467 interactions at the functional level between WAF and dispersant-amended treatments  
468 (**Figure 3**). This observation was also supported by the Bray-Curtis PERMANOVA test  
469 where the interaction terms dispersant•time, oil•time and dispersant•oil•time were  
470 significant; and the observed shift of time-dependent trends of pathways of dispersants-  
471 only compared to CEWAF(±nutrients) treatments (**Supplementary Figure 8**). In  
472 addition, *Colwellia* DE genes varied across the dispersants-only and CEWAF(±nutrients)  
473 treatments in distinct patterns. For instance, the derepression of the *fadR* regulator was  
474 not observed in the dispersants-only treatment, suggesting a WAF-dependent activation  
475 of fatty acid degradation. Furthermore, nutrient-dependent expression shifts were  
476 observed in genes involved in carbon and energy metabolism (*i.e.*, *aldB*, *acnBD*,  
477 *phbB1B2*). Finally, a large contribution of *Colwellia* transcriptomic responses were  
478 associated with the core metapangenome, suggesting an opportunistic response at genus  
479 level (**Figure 4**).

480  
481 The K2015 metatranscriptome of *Marinobacter* matched the profile of an oil degrader.  
482 WAF treatments  $t_1$ - $t_4$  showed co-clustering of *Marinobacter* with perturbations in PFL  
483 expression (**Figure 3**). Taking into account that under WAF exposure, *Marinobacter* sp.  
484 C18 showed up-regulation of  $\beta$ -oxidation genes (*fadA*, *acnA*, *dctMP*), these results may  
485 indicate that an increased activity of PFL was associated with degradation of  
486 hydrocarbons under oxygen limitation<sup>50</sup>. Additionally, much of this degradative activity  
487 was transcriptionally active in the first week of the experiment, based on the DL or EP  
488 trends in biodegradation pathways (**Supplementary Figure 7**), which is consistent with  
489 patterns of oil biodegradation measured directly by Kleindienst et al.<sup>3</sup>. Additionally, a  
490 wide variety of DE genes in *Marinobacter* were involved in interactions with its  
491 environment, such as: chemotaxis genes (*cheAY*, *mcp*), flagellar genes (*flaAIGL*, *fliK*),  
492 and genes for type IV pilus assembly (*pilAWR*, *fimV*). These observations are consistent  
493 with the description of extracellular events and biofilm formation linked to hydrocarbon  
494 degradation<sup>51-53</sup>. The majority of this WAF-specific responses appeared to be adaptations

495 at the species level (*i.e.*, accessory metapangenome of *M. sp.* C18) rather than at the  
496 genus level (*i.e.*, core metapangenome of *Marinobacter*) (**Figure 5**).

497

498 The application of dispersants and nutrients shifted the upregulation map for *Colwellia*  
499 and *Marinobacter* across treatments and over time (**Figure 6**). The WAF treatment was  
500 associated with a diverse and complex response in *Marinobacter* that involved  
501 chemotaxis, membrane two-component sensors, ABC transporters, secretion systems,  
502 quorum sensing components, chloroalkane and chloroalkene routes, butyrate, propionate  
503 and glutamate assimilation, downstream biosynthesis and metabolism of nucleotides, as  
504 well as cofactors and vitamins. In contrast, the CEWAF+nutrients amendment in  
505 *Colwellia* was associated with striking changes in the reaction map. For instance, in the  
506 CEWAF treatment we observed (1) utilization of glutamine towards the biosynthesis of  
507 inosine, a precursor for adenosine and nucleotides, (2) consumption of L-glutamate for  
508 the biosynthesis of heme cofactors, possibly involved in the biosynthesis of P450  
509 cytochromes and (3) nitrogen metabolism via transcription of [Fe-S] cluster assembly  
510 proteins. On the other hand, we observed upregulation in the CEWAF+nutrients  
511 treatment for the biosynthesis of glycerophospholipids, and the metabolism of amino  
512 acids.

513

514 Time-sensitive processes were observed at the microbial community level (**Figures 1 and**  
515 **3**), genera level (core metapangenomes, **Figures 4 and 5**), species level (accessory  
516 metapangenomes, **Figures 4 and 5**) and the metabolic reaction level (**Figure 6**).

517 Surprisingly, we could not identify DE of traditional genes involved in hydrocarbon  
518 degradation such as the  $\alpha$ -ketoglutarate-dependent dioxygenase *alkB* gene. However,  
519 Rughöft et al. (2020) reported *alkB* expression in a *Marinobacter* sp. TT1 proteome under  
520 comparable oil and dispersants exposure in an experiment with different sampling  
521 times<sup>54</sup>. The sampling times of Kleindienst et al.<sup>3</sup> could have missed the time where these  
522 genes were upregulated early in the experiment. These results underscore the role of  
523 experimental timing in capturing transcriptomic signals in an environment that is  
524 responding rapidly to perturbation.

525

526 Assessing the intersections of the K2015 sequencing datasets provided insights of the  
527 complex interactions between the microbial communities and their surrounding  
528 environment. Hydrocarbon degradation is certainly one of the microbial responses to oil  
529 and dispersants exposure, but the K2015 experiment revealed a more complex system of  
530 responses in *Colwellia* and *Marinobacter*. *Colwellia* exhibited an opportunistic response,  
531 while *Marinobacter* displayed features of an active responder tuned tightly to oil  
532 pollution. Genomic and transcriptomic plasticity promoted the success of one versus the  
533 other across the treatment regime and underscores the role of generalist vs. specialist  
534 components of marine microbiomes.

535

## 536 **Conclusion**

537

538 Interpretation of DE genes in *Colwellia* and *Marinobacter* in the context of  
539 metapangenomes provided unique and extraordinary insight into genera and species-

540 specific responses. Most of the WAF-associated responses in *Marinobacter* arose from  
541 species level responses, and *Marinobacter* sp. C18 was the closest genomic reference. In  
542 contrast, for *Colwellia*, both the core and accessory metapangenome showed  
543 transcriptomic signals, mostly in response to dispersant addition. *Colwellia* and  
544 *Marinobacter*, the main microbial drivers of the system, in dispersant amended and WAF  
545 treatments, respectively, showed functional responses that followed different treatment-  
546 and time- dependent trajectories along the metabolic map. Additionally, our analysis  
547 confirmed original results that were based only on 16S rRNA gene sequencing. Given the  
548 frequent application of synthetic dispersants in response to oil spills, these data revealed  
549 the specific metabolic drivers that give rise to community responses to perturbation.  
550 Since synthetic dispersant clearly selected against environmentally important  
551 hydrocarbon degraders, *e.g.* *Marinobacter*, this dataset further reinforces earlier findings  
552 that encourage reconsideration of this emergency response strategy in the future.

## 553 **Methods**

554

### 555 ***Sample and Data Processing***

556 Microcosm setup and sampling were described previously<sup>3</sup>. Briefly, 1,178 m deep  
557 seawater was sampled at an active natural hydrocarbon seep (site GC600, latitude  
558 27.3614, longitude -90.6018). Seawater was transferred (at 4 °C) to the laboratory at the  
559 University of Georgia for microcosm and sampling setup. 72 2-L glass bottles (1.8-L  
560 samples per bottle) were incubated on a roller table. Treatments (WAF, dispersant-only,  
561 and CEWAF ± nutrients) and biotic control were run in triplicate for each time point.  
562 Sampling (except for the CEWAF+n treatment) was performed at 0 d ( $t_0$ ), 7 d ( $t_1$ ), 17 d  
563 ( $t_2$ ), 28 d ( $t_3$ ), and 42 d ( $t_4$ ). CEWAF+n treatment was sampled at  $t_0$ ,  $t_1$ , and  $t_4$ . Samples  
564 were filtered and frozen in liquid nitrogen. RNAseq library preparation, sequencing,  
565 preliminary data processing, LRD estimation and rarefaction analysis are described in  
566 [Supplementary Methods](#).

567

### 568 ***Differential Expression and Metapangenomic Analysis***

569 We aligned all libraries to all available complete genomes in NCBI of *Colwellia* ( $n=33$ )  
570 and *Marinobacter* ( $n=113$ ) using Bowtie2<sup>55</sup>. *Colwellia psychrerythraea* 34H and  
571 *Marinobacter* sp. C18 were selected as reference genomes given their largest mapping  
572 scores (*i.e.*, average mapping counts and average mapping rates). We used SAMtools<sup>56</sup> to  
573 convert resulting SAM files into sorted and indexed BAM files.

574

575 To contrast gene expression with respect to the biotic control, we used HTSeq-count to  
576 generate the read counts of genes recruited by the reference genomes<sup>57</sup>. Profiles were  
577 normalized across all samples using the regularized logarithm transformation as  
578 implemented in DESeq2 using a generalized linear model<sup>58</sup>. Then, statistical inference  
579 was performed using the negative binomial Wald test with Cook's distance to control for  
580 outliers<sup>59</sup>. Those genes with an adjusted  $p$ -value < 0.05 (using the Benjamini-Hochberg  
581 method<sup>60</sup>) were classified as DE genes.

582

583 In order to explore ecological implications of DE genes in the context of the *Colwellia*  
584 and *Marinobacter* metapangenomes, we followed the workflow outlined in references<sup>41,61</sup>

585 and <http://merenlab.org/2016/11/08/pangenomics-v2/>. Briefly, we generated Anvi'o  
586 genome storage databases using the program `anvi-gen-genomes-storage` for  
587 each of the reference genomes. Then, we used the program `anvi-pan-genome` with  
588 default settings. Additional layers including the detection of DE genes in gene clusters  
589 were included to the pangenomic databases using the program `anvi-import-misc-`  
590 `data`. We visualized the metapangenome using the program `anvi-display-pan`.  
591 See the Code availability section for details in the workflow.

592

### 593 *Computing Sources and Visualizations*

594 All bioinformatic analyses were run on a local HPC cluster at the Georgia Advanced  
595 Computing Resource Center (University of Georgia, GA). We used Altair<sup>62</sup> or ggplot2<sup>63</sup>  
596 packages depending on the coding platform (*i.e.*, Python or R). Pathways visualization  
597 was generated using the iPath 3 module based on KEGG orthology numbers associated to  
598 DE genes<sup>44</sup>. We finalized our figures for publication using Inkscape, an open-source  
599 vector graphics editor (<http://inkscape.org>).

600

601 **Reporting Summary.** Further information on research design is available in the Nature  
602 Research Reporting Summary linked to this article.

603

### 604 **Code availability.**

605 All scripts are found on Github (<https://github.com/biotemon/K2015>).

606

### 607 **Data availability**

608 Raw sequencing reads generated for this study can be found in the Sequence Read  
609 Archive under the BioProject [PRJNA640753](https://www.ncbi.nlm.nih.gov/bioproject/PRJNA640753). We also made available a taxonomy rank  
610 database, Anvi'o metapangenomic files, and Anvi'o summarized profiles in the Open  
611 Science Framework repository at <https://osf.io/fu9bw/>.

612

### 613 **Acknowledgments**

614 This study was funded by the Gulf of Mexico Research Initiative grant: “Ecosystem  
615 Impacts of Oil and Gas Inputs to the Gulf - 2”. This study was also supported in part by  
616 resources and technical expertise from the Georgia Advances Computing Resource  
617 Center, a partnership between the University of Georgia’s Office of the Vice President  
618 for Research and the Office of the Vice President for Information Technology. T.D.  
619 Peña-Montenegro was supported by a Fulbright – Colombian Administrative Department  
620 of Science, Technology and Innovation (COLCIENCIAS) fellowship.

621

622

623

## 624 **Figure Captions**

625

626 **Figure 1.** Relative abundance of merged taxonomic ranks in the K2015  
627 metatranscriptomic libraries at a minimum allowed resolution of 4% based on taxonomy  
628 assignment performed in MG-RAST<sup>64</sup>.

629

630 **Figure 2.** Indigenous hydrocarbon degraders are consistently found in 16S rRNA gene  
sequences as well as in transcriptomic libraries. Log-transformed RNA:DNA ratio (LRD

631 ratio) distribution across K2015 metatranscriptomic libraries. Taxonomic groups are  
632 sorted from top to bottom by descending mean of LRD scores. Biosynthetic capacity  
633 estimation is expected to be Group I > Group II > Group III.

634

635 **Figure 3.** Diversity and functional dimensional analysis of the K2015 metatranscriptomic  
636 dataset. A) Principal coordinates analysis of relative abundance of taxonomic groups.  
637 Near to the X label we found the following microbial groups: *Alphaproteobacteria*,  
638 *Betaproteobacteria*, *Oceanospirillales*, *Methylobacter*, *Parvibaculum*, Chromatiales,  
639 *Hahella*. Near to the Y label we found the following microbial groups: *Neoparamoeba*,  
640 *Kangiella*, *Methylophaga*, Chromista, *Propionibacterium*, and *Microvirus* B) Functional  
641 expression of gene abundances assigned to the SEED subsystems: motility and  
642 chemotaxis, carbohydrates, membrane transport and respiration. Solid lines represent the  
643 top ten loading vectors explaining the variation of expressed genes in the analysis.  
644 Numbers in red are as follows, 1: 2-methylcitrate dehydratase FeS (EC 4.2.1.79), 2:  
645 Acetoacetyl-CoA reductase (EC 1.1.1.36), 3: Aconitate hydratase 2 (EC 4.2.1.3), 4:  
646 Acetolactase synthase large subunit (EC 2.2.1.6), 5: Acetyl-coenzyme A synthetase (EC  
647 6.2.1.1), and 6: Malate synthase G (EC 2.3.3.9).

648

649 **Figure 4.** Gene detection of metatranscriptomic reads in the context of the core and  
650 accessory metapangenome in *Colwellia*. The 33 inner layers show the presence-absence  
651 of 225 gene clusters with 6,646 genes that were identified in 33 *Colwellia* genomes. An  
652 expanded dendrogram of the reference genomes based on the distribution of gene clusters  
653 using Euclidian distance and ward clustering is shown in the top-right. *Colwellia*  
654 *psycherythraea* 34H (highlighted in blue) was the reference genome that recruited the  
655 largest fraction of transcriptomic reads among *Colwellia* genomes. Gene detection  
656 profiles of metatranscriptomic reads recruited by *C. psycherythraea* 34H are sorted and  
657 color coded by the corresponding experimental treatment: Biotic control (BC),  
658 Dispersants (Disp.) WAF, CEWAF and CEWAFN. Time is expressed in days. The next  
659 four layers show the presence-absence of differentially expressed (DE) genes with respect  
660 to the biotic control treatment are shown in blue (upregulation) and red (downregulation).  
661 A stacked-bar diagram on the right describes the DE genes counts across treatments  
662 following the color code for each of the treatments. The next two layers describe the gene  
663 clusters in which at least one gene was functionally annotated with InterProScan or  
664 COGs. Finally, the outermost layer shows the protein family name assigned to the DE  
665 gene on the corresponding cluster. Protein family names are color coded by COG  
666 categories as shown in the bottom legends. A detailed description of these DE genes is  
667 shown in [Supplementary Data 2](#).

668

669 **Figure 5.** Gene detection of metatranscriptomic reads in the context of the core and  
670 accessory metapangenome in *Marinobacter*. The 113 inner layers show the presence-  
671 absence of 342 gene clusters with 35,909 genes that were identified in 113 *Marinobacter*  
672 genomes. An expanded dendrogram of the reference genomes based on the distribution of  
673 gene clusters using Euclidian distance and ward clustering is shown in the top-right.  
674 *Marinobacter* sp. C18 (highlighted in blue) was the reference genome that recruited the  
675 largest fraction of transcriptomic reads among *Marinobacter* genomes. Gene detection  
676 profiles of metatranscriptomic reads recruited by *Marinobacter* sp. C18 are sorted and

677 color coded by the corresponding experimental treatment: Biotic control (BC),  
678 Dispersants (Disp.) WAF, CEWAF and CEWAFN. Time is expressed in days. The next  
679 four layers show the presence-absence of differentially expressed (DE) genes with respect  
680 to the biotic control treatment are shown in blue (up-regulation) and red (down-  
681 regulation). A stacked-bar diagram on the right describes the DE genes counts across  
682 treatments following the color code for each of the treatments. The next two layers  
683 describe the gene clusters in which at least one gene was functionally annotated with  
684 InterproScan or COGs. Finally, the outermost layer shows the protein family name  
685 assigned to the DE gene on the corresponding cluster. Protein family names are color  
686 coded by COG categories as shown in the bottom legends. A detailed description of these  
687 DE genes is shown in [Supplementary Data 2](#).

688  
689 **Figure 6.** Up-regulation of metabolic pathways under dispersants, WAF, CEWAF and  
690 CEWAF+nutrients exposure in *Colwellia psycherythraea* 34H and *Marinobacter* sp.  
691 C18. Lines and dots in red and blue indicate upregulated reactions or components in  
692 *Colwellia psycherythraea* 34H and *Marinobacter* sp. C18, respectively. Pathway  
693 visualization was generated using the iPath 3 module based on KEGG orthology numbers  
694 <sup>44</sup>. An interactive version of the metabolic map is available at  
695 <https://pathways.embl.de/selection/xqvYg5kHHCsxGqWy8yJ>  
696

## 697 **References**

- 698 1. Crone, T. J. & Tolstoy, M. Magnitude of the 2010 Gulf of Mexico oil leak. *Science* **330**, 634–634  
699 (2010).
- 700 2. National Commission on the BP Deepwater Horizon Oil Spill and Offshore Drilling. *The use of*  
701 *surface and subsea dispersants during the BP Deepwater Horizon oil spill*. (National Commission  
702 on the BP Deepwater Horizon Oil Spill and Offshore Drilling., 2011).
- 703 3. Kleindienst, S. *et al.* Chemical dispersants can suppress the activity of natural oil-degrading  
704 microorganisms. *Proceedings of the National Academy of Sciences* **112**, 14900–14905 (2015).
- 705 4. Techtmann, S. M. *et al.* Corexit 9500 enhances oil biodegradation and changes active bacterial  
706 community structure of oil-enriched microcosms. *Appl Environ Microbiol* **83**, e03462-16, e03462-  
707 16 (2017).
- 708 5. Hamdan, L. & Fulmer, P. Effects of COREXIT® EC9500A on bacteria from a beach oiled by the  
709 Deepwater Horizon spill. *Aquat. Microb. Ecol.* **63**, 101–109 (2011).
- 710 6. Lee, K.-W., Shim, W. J., Yim, U. H. & Kang, J.-H. Acute and chronic toxicity study of the water  
711 accommodated fraction (WAF), chemically enhanced WAF (CEWAF) of crude oil and dispersant



- 712 in the rock pool copepod *Tigriopus japonicus*. *Chemosphere* **92**, 1161–1168 (2013).
- 713 7. Mu, J., Jin, F., Ma, X., Lin, Z. & Wang, J. Comparative effects of biological and chemical  
714 dispersants on the bioavailability and toxicity of crude oil to early life stages of marine medaka  
715 (*Oryzias melastigma*): Dispersed oil bioavailability and toxicity for marine medaka. *Environ*  
716 *Toxicol Chem* **33**, 2576–2583 (2014).
- 717 8. Li, X. *et al.* Toxicity of Water-Accommodated Fractions (WAF), Chemically Enhanced WAF  
718 (CEWAF) of Oman crude oil and dispersant to early-life stages of Zebrafish (*Danio rerio*). *Bull*  
719 *Environ Contam Toxicol* **101**, 314–319 (2018).
- 720 9. Katsumiti, A. *et al.* In vitro toxicity testing in hemocytes of the marine mussel *Mytilus*  
721 *galloprovincialis* (L.) to uncover mechanisms of action of the water accommodated fraction (WAF)  
722 of a naphthenic North Sea crude oil without and with dispersant. *Science of The Total Environment*  
723 **670**, 1084–1094 (2019).
- 724 10. Prince, R. C., Coolbaugh, T. S. & Parkerton, T. F. Oil dispersants do facilitate biodegradation of  
725 spilled oil. *Proc Natl Acad Sci USA* **113**, E1421–E1421 (2016).
- 726 11. Kleindienst, S. *et al.* Reply to Prince et al.: Ability of chemical dispersants to reduce oil spill impacts  
727 remains unclear. *Proc Natl Acad Sci USA* **113**, E1422–E1423 (2016).
- 728 12. Mason, O. U. *et al.* Metagenome, metatranscriptome and single-cell sequencing reveal microbial  
729 response to Deepwater Horizon oil spill. *ISME J* **6**, 1715–1727 (2012).
- 730 13. Rodriguez-R, L. M. *et al.* Microbial community successional patterns in beach sands impacted by  
731 the Deepwater Horizon oil spill. *ISME J* **9**, 1928–1940 (2015).
- 732 14. Dubinsky, E. A. *et al.* Succession of hydrocarbon-degrading bacteria in the aftermath of the  
733 Deepwater Horizon oil spill in the Gulf of Mexico. *Environ. Sci. Technol.* **47**, 10860–10867 (2013).
- 734 15. Hazen, T. C. *et al.* Deep-sea oil plume enriches indigenous oil-degrading Bacteria. *Science* **330**,  
735 204–208 (2010).
- 736 16. Valentine, D. L. *et al.* Propane respiration jump-starts microbial response to a deep oil spill. *Science*  
737 **330**, 208–211 (2010).
- 738 17. Redmond, M. C. & Valentine, D. L. Natural gas and temperature structured a microbial community

- 739 response to the Deepwater Horizon oil spill. *Proceedings of the National Academy of Sciences* **109**,  
740 20292–20297 (2012).
- 741 18. Campeão, M. E. *et al.* The Deep-sea microbial community from the Amazonian Basin associated  
742 with oil degradation. *Front. Microbiol.* **8**, 1019 (2017).
- 743 19. Baelum, J. *et al.* Deep-sea bacteria enriched by oil and dispersant from the Deepwater Horizon  
744 spill: Enrichment of oil degraders from Gulf of Mexico. *Environmental Microbiology* **14**, 2405–  
745 2416 (2012).
- 746 20. Gutierrez, T. *et al.* Hydrocarbon-degrading bacteria enriched by the Deepwater Horizon oil spill  
747 identified by cultivation and DNA-SIP. *ISME J* **7**, 2091–2104 (2013).
- 748 21. Rivers, A. R. *et al.* Transcriptional response of bathypelagic marine bacterioplankton to the  
749 Deepwater Horizon oil spill. *ISME J* **7**, 2315–2329 (2013).
- 750 22. Gauthier, M. J. *et al.* *Marinobacter hydrocarbonoclasticus* gen. nov., sp. nov., a new, extremely  
751 halotolerant, hydrocarbon-degrading marine bacterium. *International Journal of Systematic*  
752 *Bacteriology* **42**, 568–576 (1992).
- 753 23. Ivanova, E. P. *et al.* Draft genome sequences of *Marinobacter similis* A3d10T and *Marinobacter*  
754 *salarius* R9SW1T. *Genome Announcements* **2**, e00442-14, 2/3/e00442-14 (2014).
- 755 24. Dombrowski, N. *et al.* Reconstructing metabolic pathways of hydrocarbon-degrading bacteria from  
756 the Deepwater Horizon oil spill. *Nature Microbiology* 16057 (2016)  
757 doi:10.1038/nmicrobiol.2016.57.
- 758 25. Yuan, J. The diversity of PAH-degrading bacteria in a deep-sea water column above the Southwest  
759 Indian Ridge. *Front. Microbiol.* **6**, (2015).
- 760 26. Tremblay, J. *et al.* Chemical dispersants enhance the activity of oil- and gas condensate-degrading  
761 marine bacteria. *ISME J* **11**, 2793–2808 (2017).
- 762 27. Rughöft, S., Vogel, A., Joye, S. B., Gutierrez, T. & Kleindienst, S. Starvation-dependent inhibition  
763 of the hydrocarbon degrader *Marinobacter* sp. TT1 by a chemical dispersant. (In preparation).
- 764 28. Mason, O. U., Han, J., Woyke, T. & Jansson, J. K. Single-cell genomics reveals features of a  
765 *Colwellia* species that was dominant during the Deepwater Horizon oil spill. *Frontiers in*

- 766        *Microbiology* **5**, (2014).
- 767    29. Sun, X. *et al.* Dispersant enhances hydrocarbon degradation and alters the structure of metabolically  
768        active microbial communities in shallow seawater from the northeastern Gulf of Mexico. *Front.*  
769        *Microbiol.* **10**, 2387 (2019).
- 770    30. Tremblay, J. *et al.* Metagenomic and metatranscriptomic responses of natural oil degrading bacteria  
771        in the presence of dispersants. *Environ Microbiol* **21**, 2307–2319 (2019).
- 772    31. Liu, A. *et al.* Whole genome analysis calls for a taxonomic rearrangement of the genus *Colwellia*.  
773        *Antonie van Leeuwenhoek* **113**, 919–931 (2020).
- 774    32. Chakraborty, R., Borglin, S. E., Dubinsky, E. A., Andersen, G. L. & Hazen, T. C. Microbial  
775        Response to the MC-252 Oil and Corexit 9500 in the Gulf of Mexico. *Front Microbiol* **3**, (2012).
- 776    33. Kleindienst, S., Paul, J. H. & Joye, S. B. Using dispersants after oil spills: impacts on the  
777        composition and activity of microbial communities. *Nature Reviews Microbiology* **13**, 388–396  
778        (2015).
- 779    34. Dlott, G., Maul, J. E., Buyer, J. & Yarwood, S. Microbial rRNA:rDNA gene ratios may be  
780        unexpectedly low due to extracellular DNA preservation in soils. *Journal of Microbiological*  
781        *Methods* **115**, 112–120 (2015).
- 782    35. Chícharo, M. & Chícharo, L. RNA:DNA ratio and other nucleic acid derived indices in marine  
783        ecology. *IJMS* **9**, 1453–1471 (2008).
- 784    36. Schleheck, D. *et al.* Complete genome sequence of *Parvibaculum lavamentivorans* type strain (DS-  
785        1T). *Standards in Genomic Sciences* **5**, 298–310 (2011).
- 786    37. King, G. M., Kostka, J. E., Hazen, T. C. & Sobecky, P. A. Microbial Responses to the *Deepwater*  
787        *Horizon* Oil Spill: From Coastal Wetlands to the Deep Sea. *Annual Review of Marine Science* **7**,  
788        377–401 (2015).
- 789    38. Brakstad, O. G., Throne-Holst, M., Netzer, R., Stoeckel, D. M. & Atlas, R. M. Microbial  
790        communities related to biodegradation of dispersed Macondo oil at low seawater temperature with  
791        Norwegian coastal seawater: Microbial communities during oil biodegradation. *Microbial*  
792        *Biotechnology* **8**, 989–998 (2015).

- 793 39. Bacosa, H. P. *et al.* Hydrocarbon degradation and response of seafloor sediment bacterial  
794 community in the northern Gulf of Mexico to light Louisiana sweet crude oil. *ISME J* **12**, 2532–  
795 2543 (2018).
- 796 40. Eren, A. M. *et al.* Anvi'o: an advanced analysis and visualization platform for 'omics data. *PeerJ*  
797 **3**, e1319 (2015).
- 798 41. Delmont, T. O. & Eren, A. M. Linking pangenomes and metagenomes: the *Prochlorococcus*  
799 metapangenome. *PeerJ* **6**, e4320 (2018).
- 800 42. My, L. *et al.* Transcription of the *Escherichia coli* fatty acid synthesis operon *fabHDG* is directly  
801 activated by FadR and inhibited by ppGpp. *Journal of Bacteriology* **195**, 3784–3795 (2013).
- 802 43. Dos Santos, P. C., Johnson, D. C., Ragle, B. E., Unciuleac, M.-C. & Dean, D. R. Controlled  
803 Expression of *nif* and *isc* iron-sulfur protein maturation components reveals target specificity and  
804 limited functional replacement between the two systems. *JB* **189**, 2854–2862 (2007).
- 805 44. Darzi, Y., Letunic, I., Bork, P. & Yamada, T. iPath3.0: interactive pathways explorer v3. *Nucleic*  
806 *Acids Res* **46**, W510–W513 (2018).
- 807 45. McKay, L. J., Gutierrez, T. & Teske, A. P. Development of a group-specific 16S rRNA-targeted  
808 probe set for the identification of *Marinobacter* by fluorescence in situ hybridization. *Deep Sea*  
809 *Research Part II: Topical Studies in Oceanography* **129**, 360–367 (2016).
- 810 46. Yang, T. *et al.* Pulsed blooms and persistent oil-degrading bacterial populations in the water column  
811 during and after the Deepwater Horizon blowout. *Deep Sea Research Part II: Topical Studies in*  
812 *Oceanography* **129**, 282–291 (2016).
- 813 47. Chen, Q. *et al.* Effects of marine oil pollution on microbial diversity in coastal waters and  
814 stimulating indigenous microorganism bioremediation with nutrients. *Regional Studies in Marine*  
815 *Science* **39**, 101395 (2020).
- 816 48. Royo-Llonch, M., Sánchez, P., González, J. M., Pedrós-Alió, C. & Acinas, S. G. Ecological and  
817 functional capabilities of an uncultured *Kordia* sp. *Systematic and Applied Microbiology* **43**,  
818 126045 (2020).
- 819 49. Blackstock, J. C. The tricarboxylate cycle. in *Guide to Biochemistry* 149–159 (Elsevier, 1989).

- 820       doi:10.1016/B978-0-7236-1151-6.50018-2.
- 821   50. Krivoruchko, A., Zhang, Y., Siewers, V., Chen, Y. & Nielsen, J. Microbial acetyl-CoA metabolism  
822       and metabolic engineering. *Metabolic Engineering* **28**, 28–42 (2015).
- 823   51. Mounier, J. *et al.* The marine bacterium *Marinobacter hydrocarbonoclasticus* SP17 degrades a  
824       wide range of lipids and hydrocarbons through the formation of oleolytic biofilms with distinct  
825       gene expression profiles. *FEMS Microbiol Ecol* **90**, 816–831 (2014).
- 826   52. Ennouri, H. *et al.* The extracellular matrix of the oleolytic biofilms of *Marinobacter*  
827       *hydrocarbonoclasticus* comprises cytoplasmic proteins and T2SS effectors that promote growth on  
828       hydrocarbons and lipids. *Environ Microbiol* **19**, 159–173 (2017).
- 829   53. Espinosa-Urgel, M. & Marqués, S. New insights in the early extracellular events in hydrocarbon  
830       and lipid biodegradation. *Environ Microbiol* **19**, 15–18 (2017).
- 831   54. Rughöft, S., Jehmlich, N., Gutierrez, T. & Kleindienst, S. Comparative proteomics of *Marinobacter*  
832       sp. TT1 reveals Corexit impacts on hydrocarbon metabolism, chemotactic motility and biofilm  
833       formation. (Submitted).
- 834   55. Langmead, B. & Salzberg, S. L. Fast gapped-read alignment with Bowtie 2. *Nature Methods* **9**,  
835       357–359 (2012).
- 836   56. Li, H. *et al.* The Sequence Alignment/Map format and SAMtools. *Bioinformatics* **25**, 2078–2079  
837       (2009).
- 838   57. Anders, S., Pyl, P. T. & Huber, W. HTSeq—a Python framework to work with high-throughput  
839       sequencing data. *Bioinformatics* **31**, 166–169 (2015).
- 840   58. Love, M. I., Huber, W. & Anders, S. Moderated estimation of fold change and dispersion for RNA-  
841       seq data with DESeq2. *Genome Biology* **15**, (2014).
- 842   59. Cook, R. D. Detection of influential observation in linear regression. *Technometrics* **19**, 15–18  
843       (1977).
- 844   60. Benjamini, Y. & Hochberg, Y. Controlling the False Discovery Rate: A practical and powerful  
845       approach to multiple testing. *Journal of the Royal Statistical Society. Series B (Methodological)* **57**,  
846       289–300 (1995).

- 847 61. Reveillaud, J. *et al.* The *Wolbachia* mobilome in *Culex pipiens* includes a putative plasmid. *Nat*  
848 *Commun* **10**, 1051 (2019).
- 849 62. VanderPlas, J. *et al.* Altair: interactive statistical visualizations for Python. *JOSS* **3**, 1057 (2018).
- 850 63. Ginestet, C. ggplot2: elegant graphics for data analysis: book reviews. *Journal of the Royal*  
851 *Statistical Society: Series A (Statistics in Society)* **174**, 245–246 (2011).
- 852 64. Meyer, F. *et al.* The metagenomics RAST server – a public resource for the automatic phylogenetic  
853 and functional analysis of metagenomes. *BMC Bioinformatics* **9**, (2008).
- 854

Figure 1

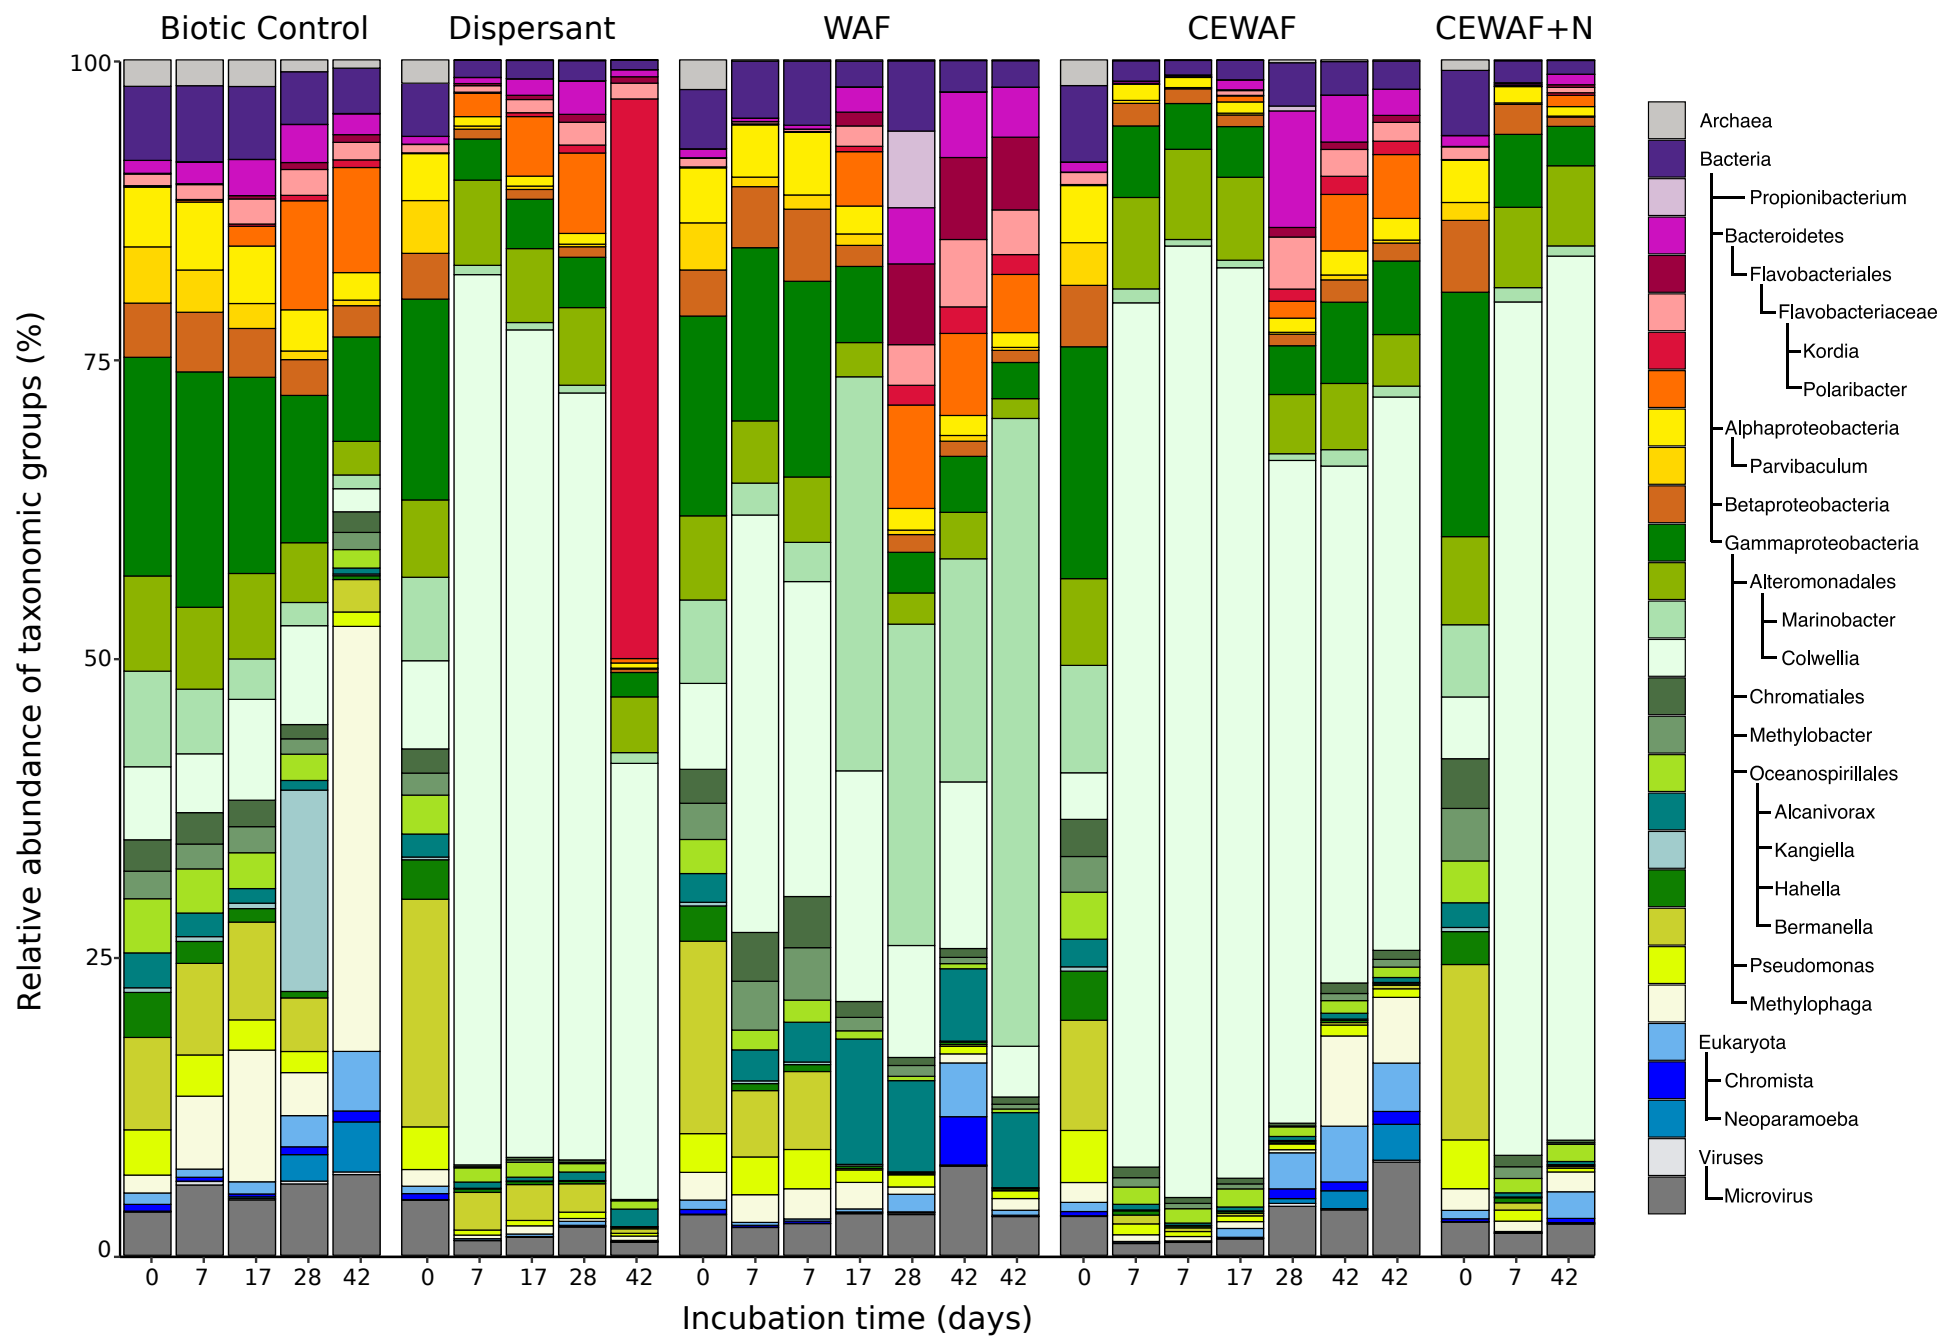

Figure 2

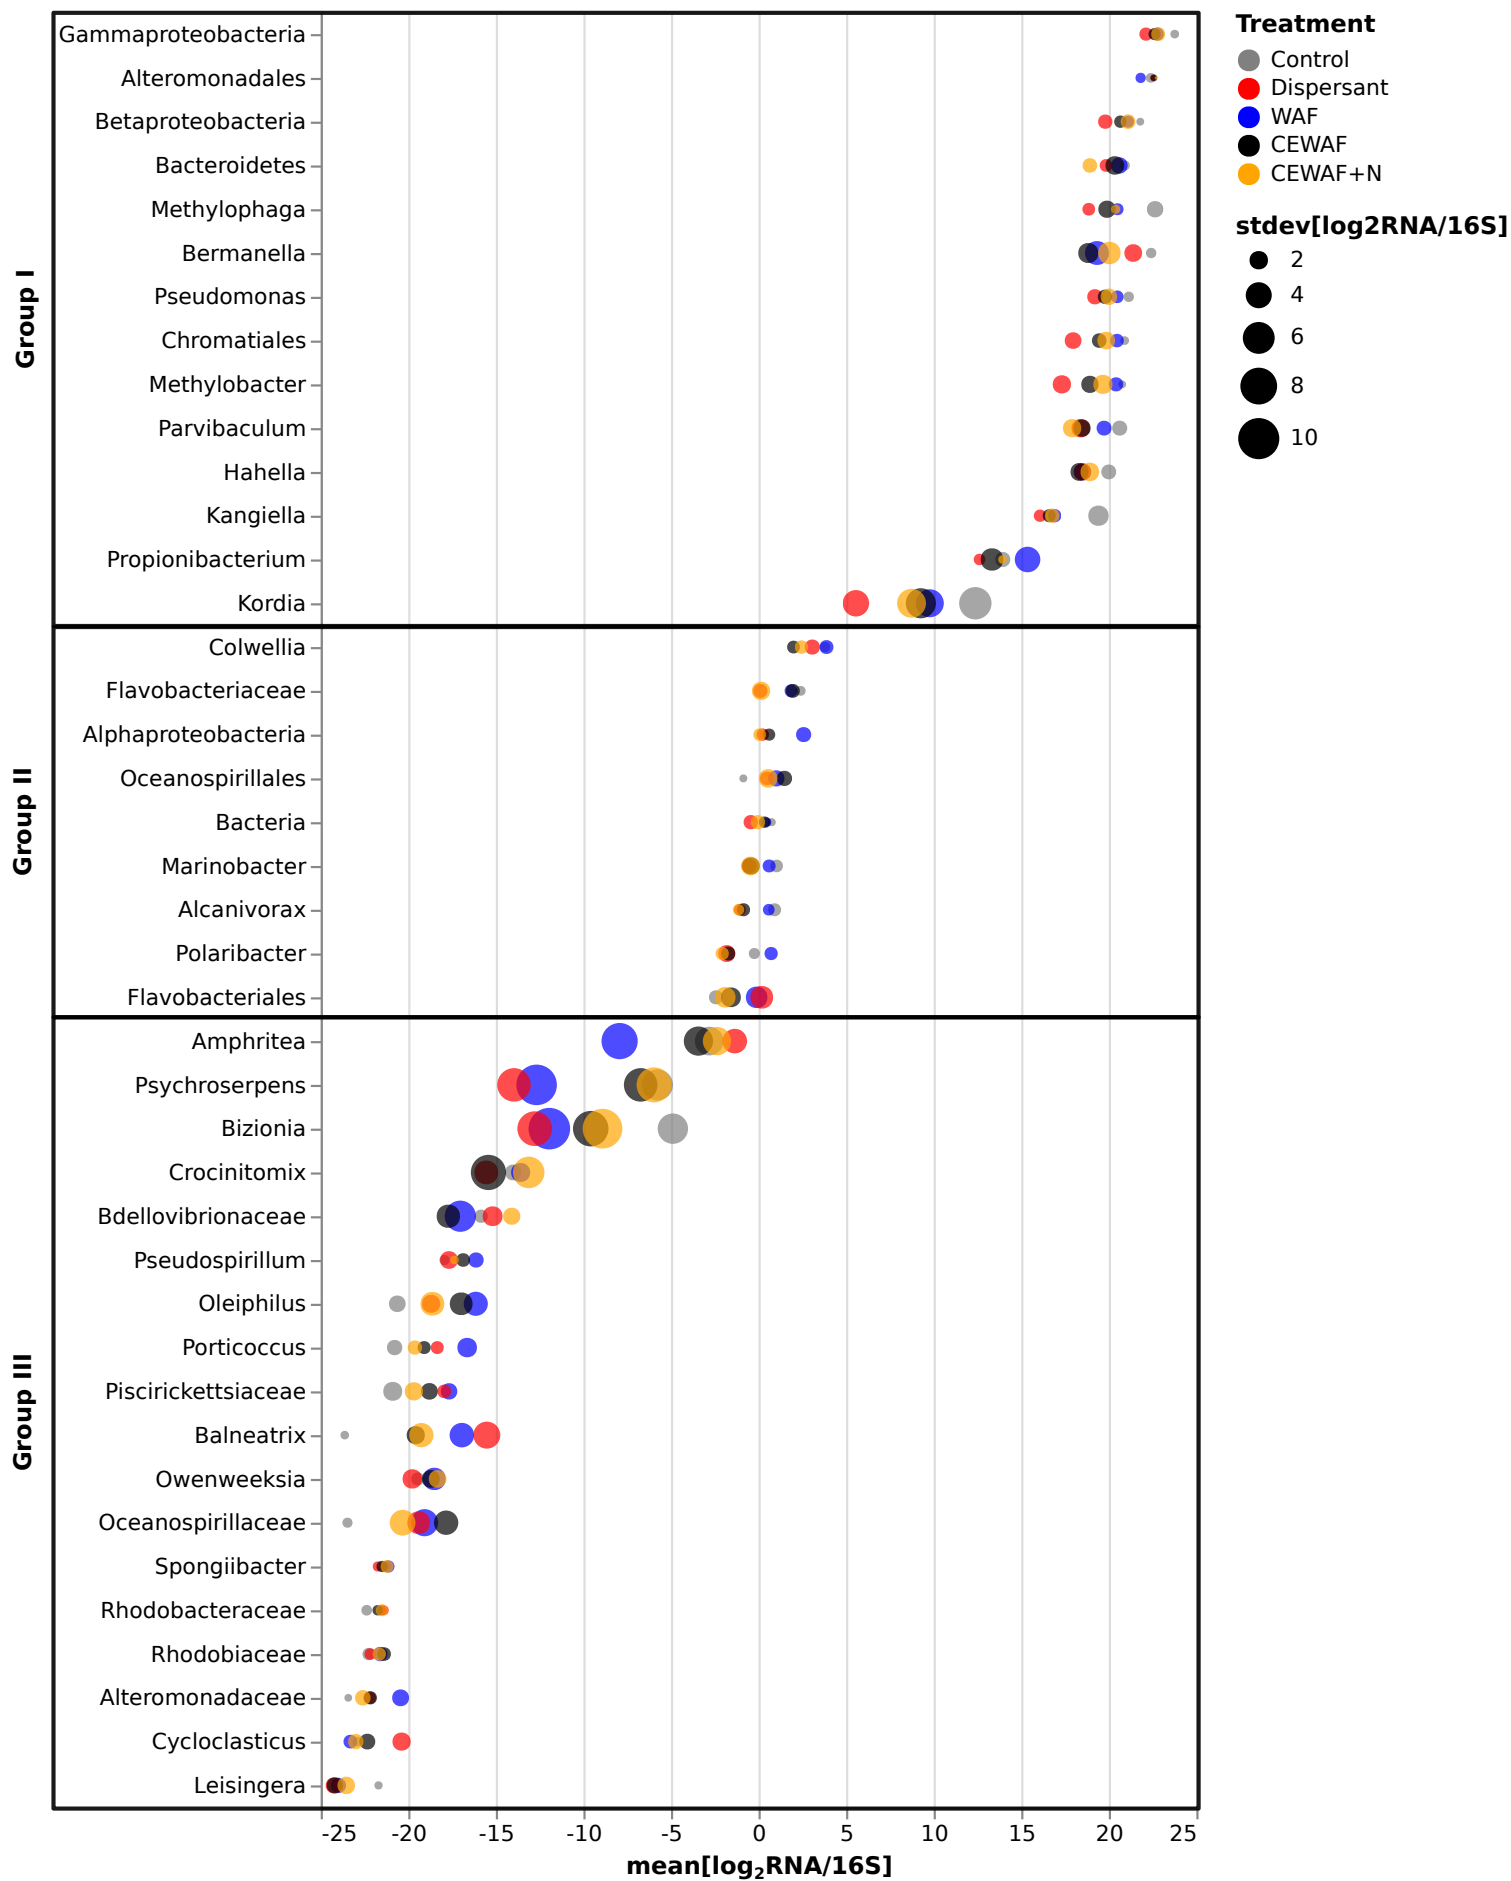



A

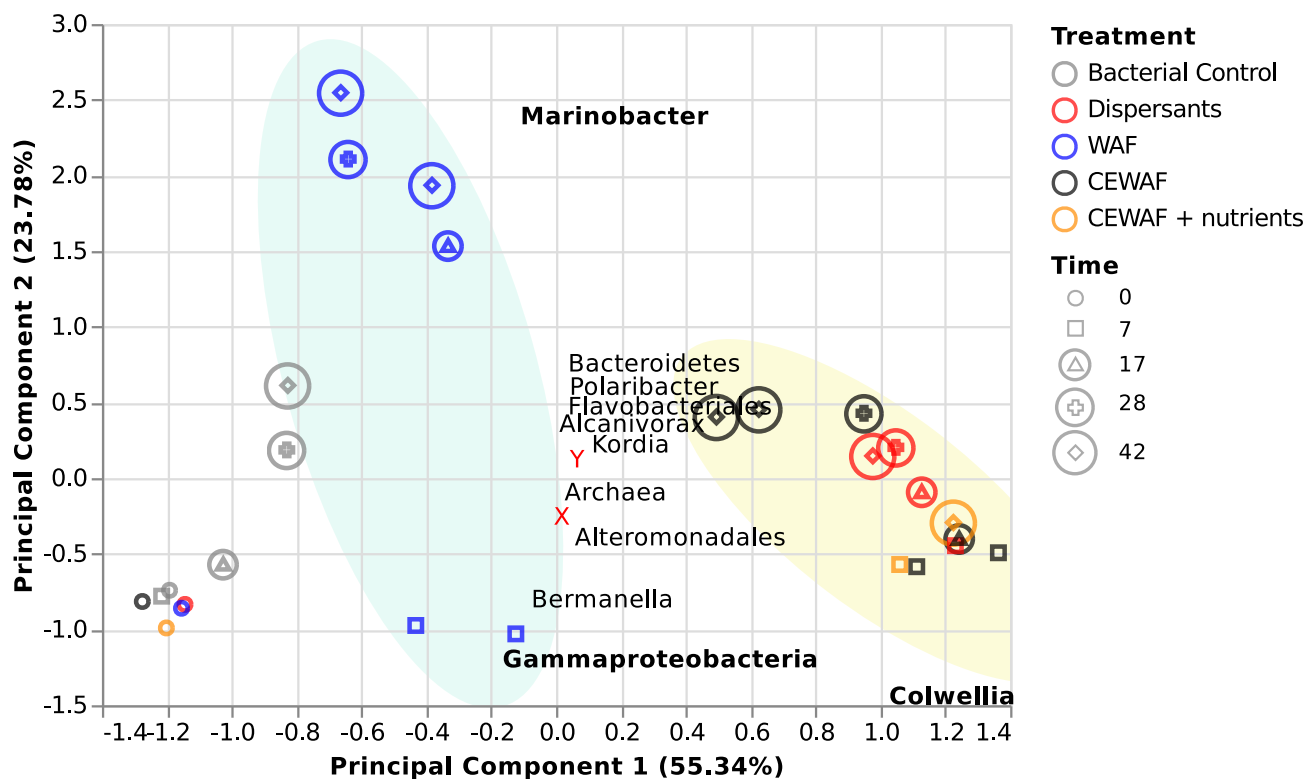

B

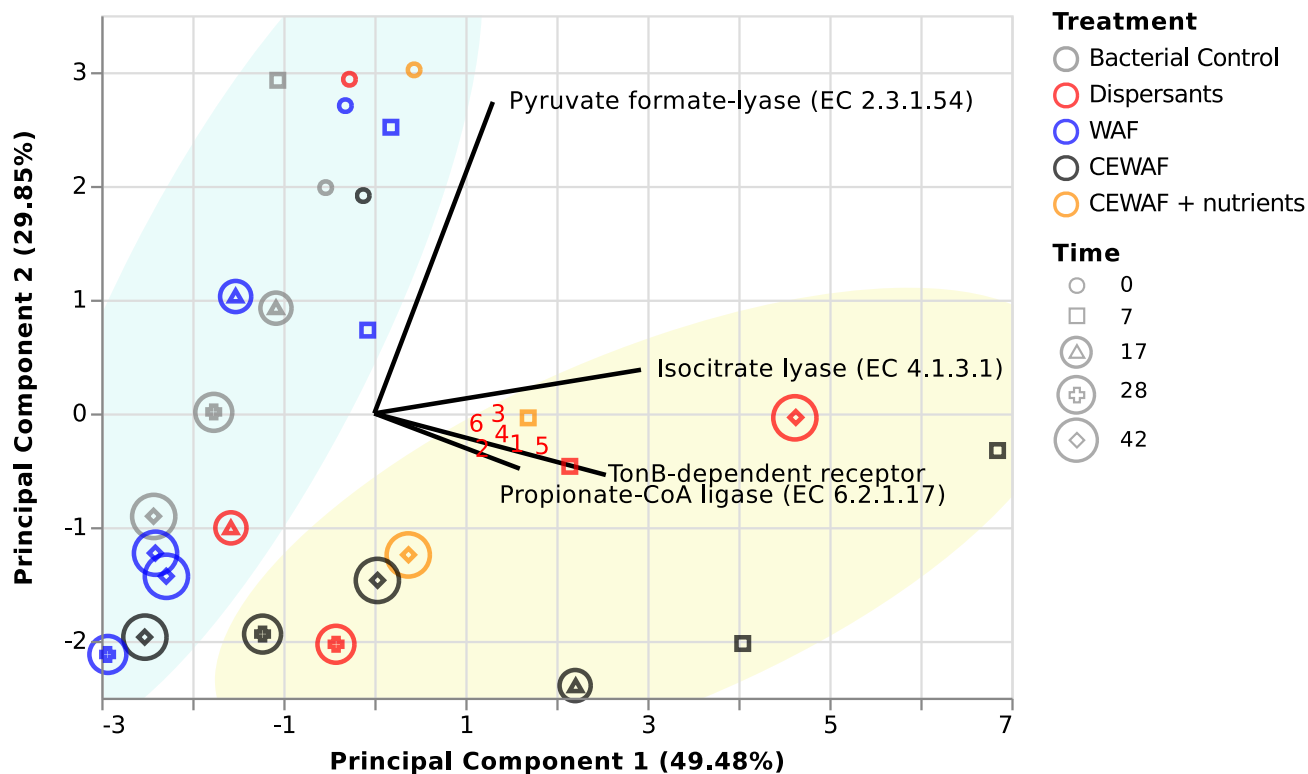

Figure 4

# Colwellia Metapangenome

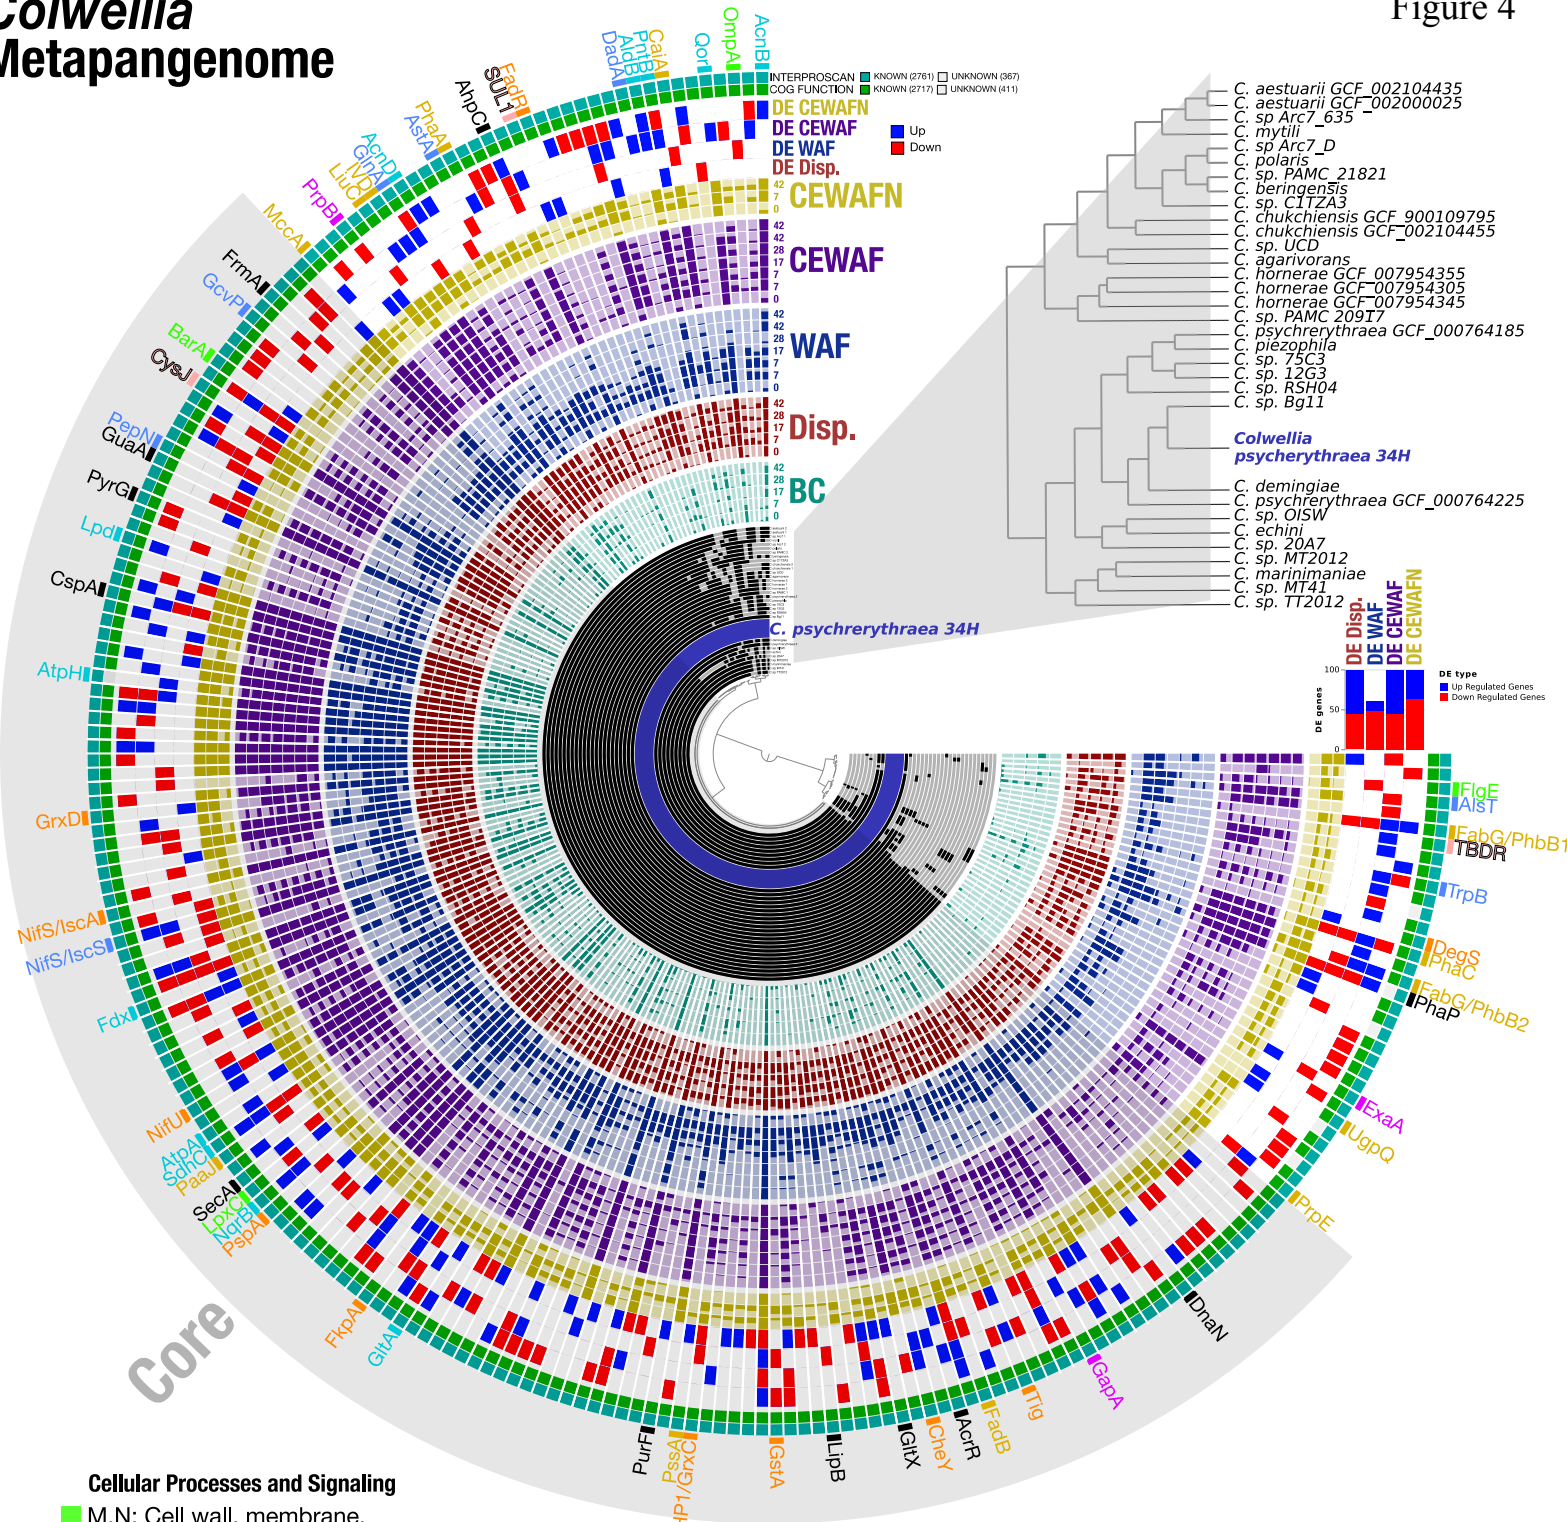

**Cellular Processes and Signaling**

- M,N: Cell wall, membrane, envelope biogenesis, cell motility
- O,T: Post-translational modification, protein turnover, chaperones and signal transduction mechanisms
- Other COG categories

**Metabolism**

- C: Energy production and conversion
- E: Amino acid metabolism and transport
- G: Carbohydrate metabolism and transport
- I: Lipid metabolism
- P: Inorganic ion transport and metabolism

Core

# Marinobacter Metapangenome

Figure 5

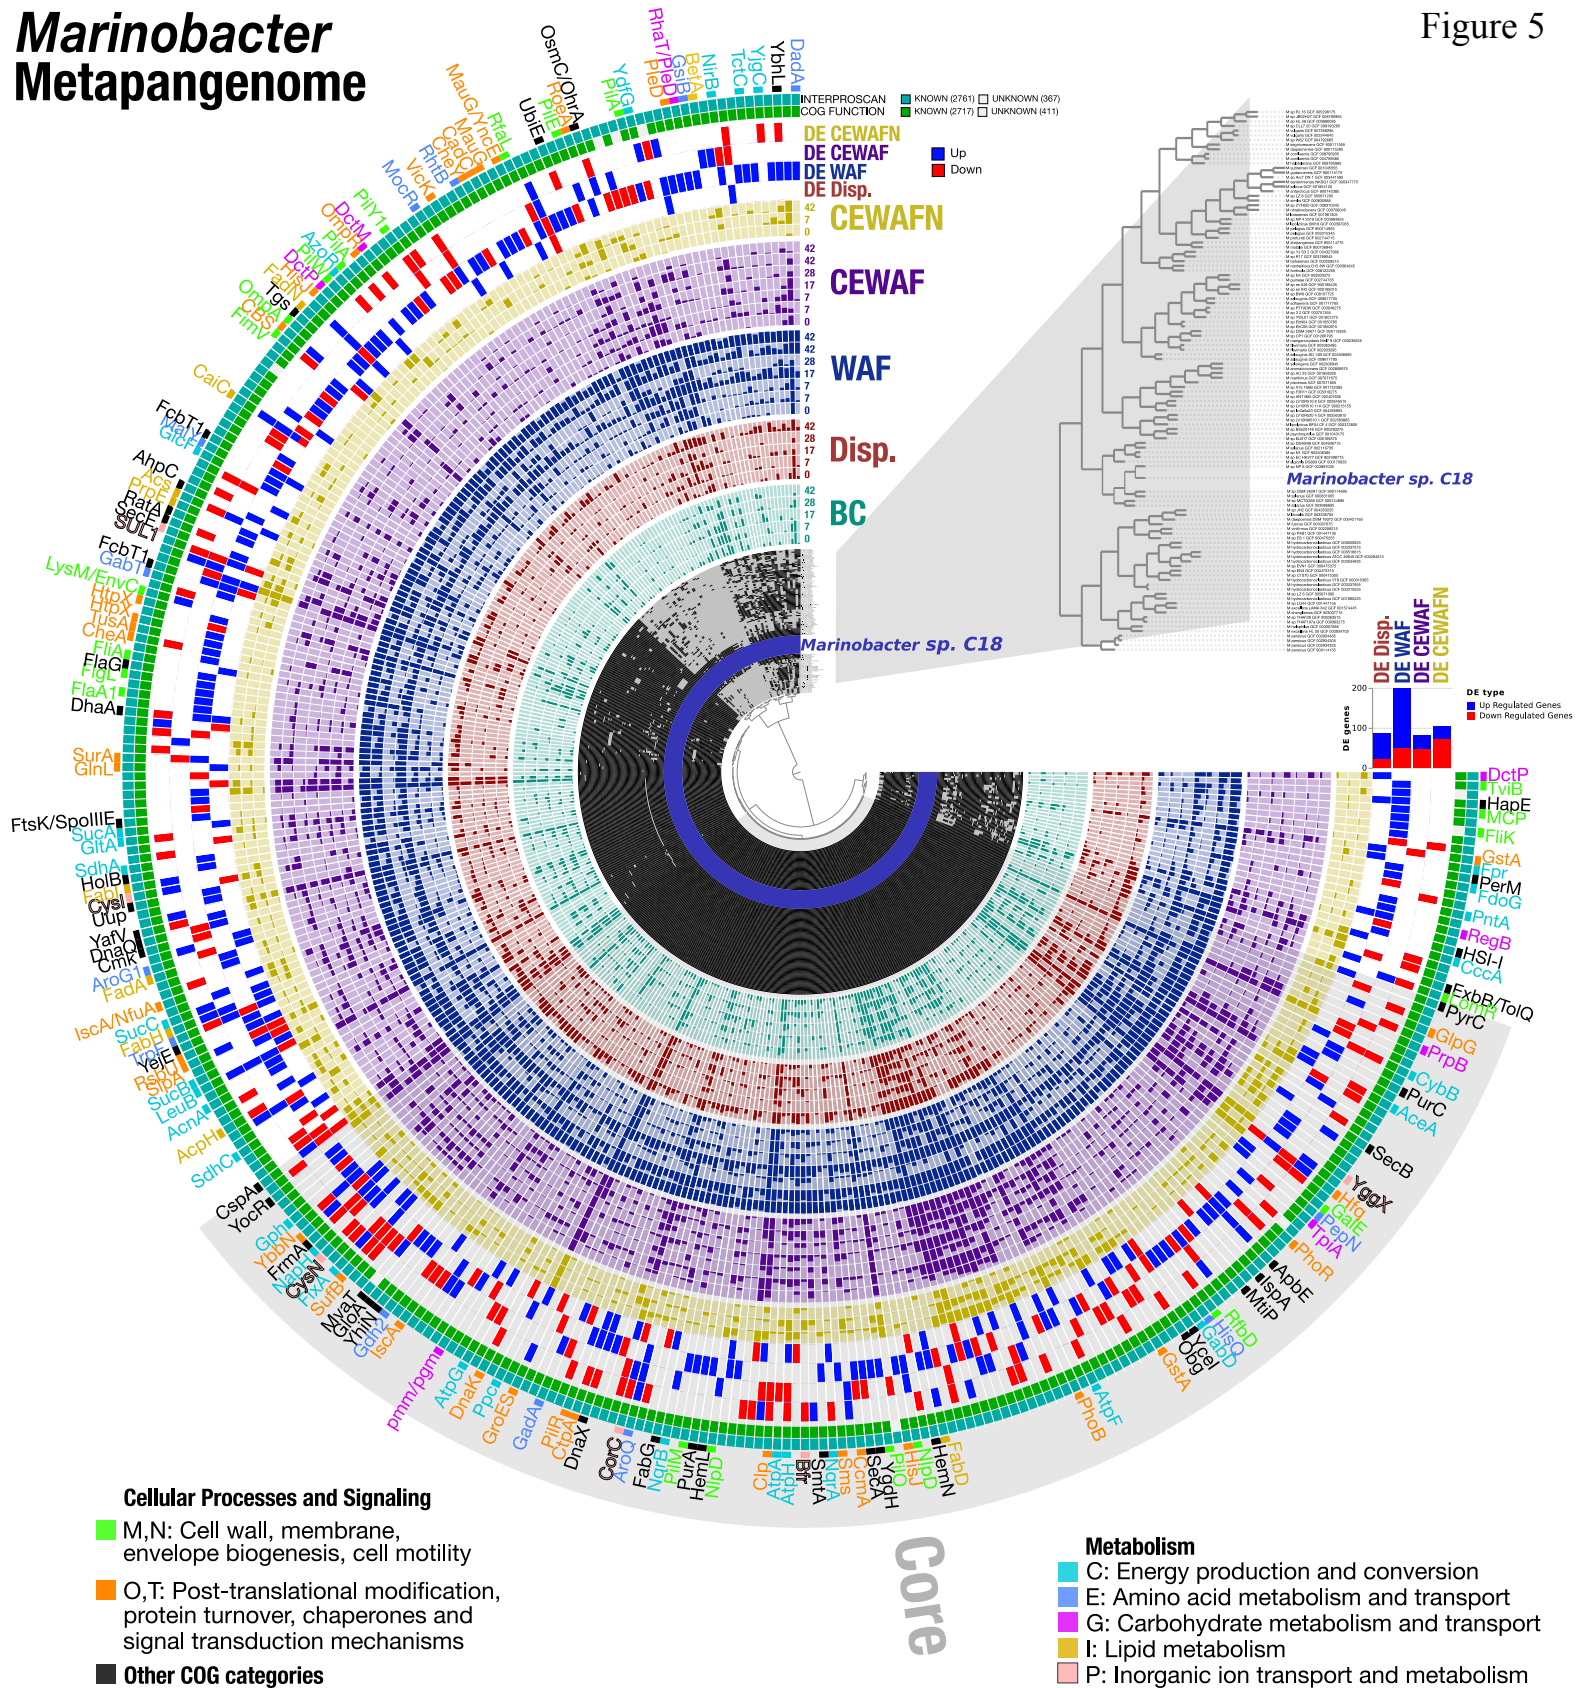

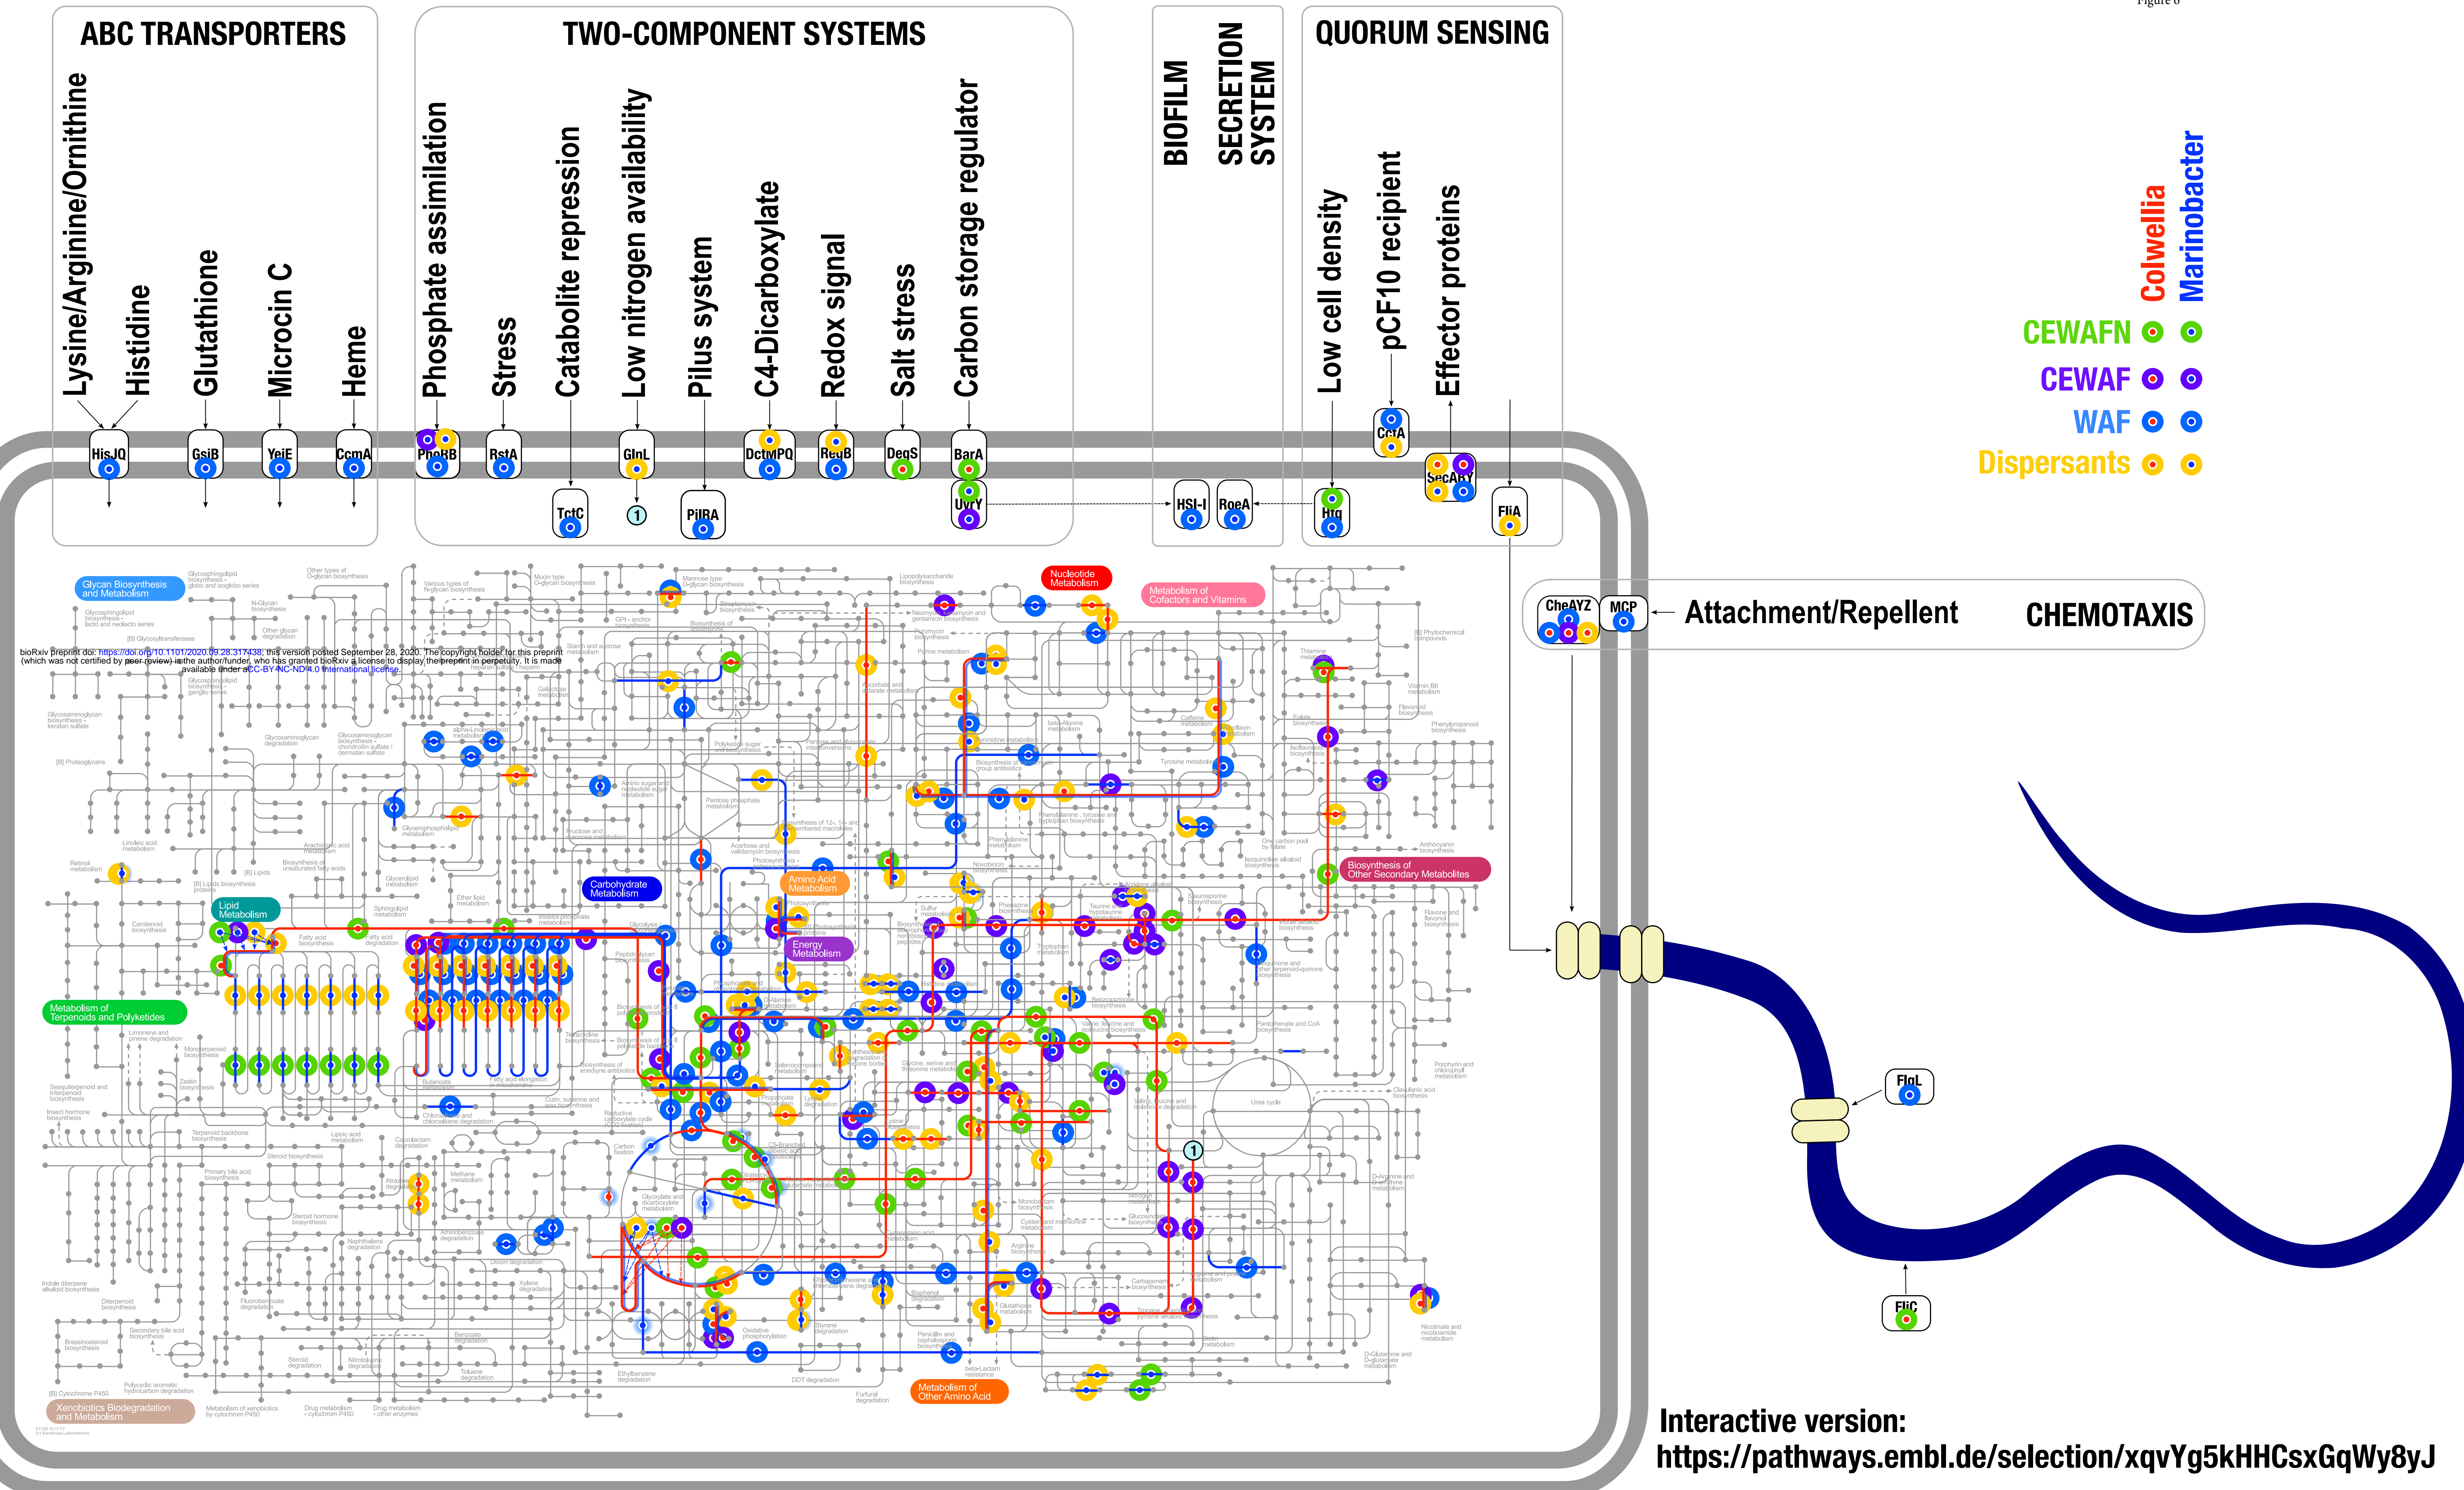

Interactive version:  
<https://pathways.embl.de/selection/xqvYg5kHHCsxGqWy8yJ>
